# Supplementary material for: Organocatalytic asymmetric selenofunctionalization of tryptamine for the synthesis of hexahydropyrrolo[2,3-b]indole derivatives
Source: PubMed Central journal article supplement (PMC3740605; doi:10.3762/bjoc.9.177), 2013-08-01

**Supporting Information**  
for  
**Organocatalytic asymmetric selenofunctionalization of  
tryptamine for the synthesis of  
hexahydropyrrolo[2,3-*b*]indole derivatives**

Qiang Wei, Ya-Yi Wang, Yu-Liu Du and Liu-Zhu Gong\*

Address: Hefei National Laboratory for Physical Sciences at the Microscale and  
Department of Chemistry, University of Science and Technology of China, Hefei, 230026,  
China

Email: Liu-Zhu Gong - gonglz@ustc.edu.cn

### **Experimental part**

**General data:** NMR spectra were recorded on a Bruker 400 MHz spectrometer. Mass spectra were recorded on a Thermo LTQ Orbitrap XL (ESI<sup>+</sup>). Infrared spectra were recorded on a Nicolet MX-1E FTIR spectrometer. HPLC analysis was performed on Waters-Breeze (2487 Dual  $\lambda$  Absorbance Detector and 1525 Binary HPLC Pump, UV detection monitored at 205 nm or 254 nm). Chiralpak OD and IA, columns were purchased from Daicel Chemical Industries, LTD. Dichloromethane and 1,2-dichloroethane were dried over CaH<sub>2</sub> and distilled prior to use. Hexane and ethyl acetate for the column chromatography were distilled before use. The relative and absolute configurations of **4a** were assigned by the X-ray analysis.

**Materials:** All starting materials were purchased from Acros and Aldrich and used directly.

The tryptamine was prepared according to literature methods, purified by chromatography and recrystallization from ethanol.

### General procedure for tryptamine derivatives

A mixture of tryptamine (5 mmol) and Et<sub>3</sub>N (6 mmol) in CH<sub>2</sub>Cl<sub>2</sub> (40 mL) was stirred at 0 °C, and then FmocCl (7 mmol) was added with a spoon. The reaction mixture was stirred at room temperature until the reaction was complete (the reaction time was 1–4 hours). The resultant solution was washed with water and extracted with EtOAc. The combined organic layers were washed with brine and dried over anhydrous Na<sub>2</sub>SO<sub>4</sub>. The crude product was purified through flash column chromatography on silica gel (eluent: petroleum ether:ethyl acetate = 4:1–2:1) to yield pure products (Fmoc-2-(1*H*-indol-3-yl)ethylcarbamate), yield 84%.

To a mixture of Fmoc-2-(1*H*-indol-3-yl)ethylcarbamate (4 mmol) and Bu<sub>4</sub>NHSO<sub>4</sub> (0.8 mmol) in CH<sub>2</sub>Cl<sub>2</sub> (30 mL) were sequentially added Ac<sub>2</sub>O (8 mmol) and aqueous NaOH solution (2 mol/L, 5 mL) at 0 °C via sryinge. The reaction mixture was stirred at room temperature until the reaction was complete (the reaction time was 5–15 minutes; the Fmoc group would be removed for a long time). The resultant solution was poured into a mixture of water and EtOAc (1/1 ratio). The aqueous layer was extracted with EtOAc (3 × 40 mL). The combined organic layers were washed with brine and dried over anhydrous Na<sub>2</sub>SO<sub>4</sub>. The crude product was purified through flash column chromatography on silica gel (eluent: petroleum ether:ethyl acetate = 3:1–2:1) to give products (Fmoc-2-(1-acetyl-1*H*-indol-3-yl) ethylcarbamate), yield: 91%.

#### (9*H*-Fluoren-9-yl)methyl 2-(1-acetyl-1*H*-indol-3-yl)ethylcarbamate (1a).

<sup>1</sup>H NMR (CDCl<sub>3</sub>, 400 MHz) δ (ppm): 2.57 (s, 3H), 2.93 (m, 2H), 3.56 (m, 2H), 4.20 (t, *J* = 6.72 Hz, 1H), 4.43 (d, *J* = 6.72 Hz, 2H), 4.88 (m, 1H), 7.28 (m, 4H), 7.39 (m, 3H), 7.55 (m, 3H), 7.75 (d, *J* = 7.52 Hz, 2H), 8.43 (d, *J* = 8.04 Hz, 1H).

#### (9*H*-Fluoren-9-yl)methyl 2-(1-acetyl-6-fluoro-1*H*-indol-3-yl)ethylcarbamate (1b).

<sup>1</sup>H NMR (CDCl<sub>3</sub>, 400 MHz) δ (ppm): 2.55 (s, 3H), 2.89 (m, 2H), 3.55 (m, 2H), 4.21 (t, *J* = 6.70 Hz, 1H), 4.43 (d, *J* = 6.70 Hz, 2H), 4.93 (m, 1H), 7.27 (m, 3H), 7.38 (m, 3H), 7.55 (d, *J* = 7.44 Hz, 2H), 7.75 (m, 3H), 8.58 (s, 1H).

#### (9*H*-Fluoren-9-yl)methyl 2-(1-acetyl-5-fluoro-1*H*-indol-3-yl)ethylcarbamate (1c).

<sup>1</sup>H-NMR (CDCl<sub>3</sub>, 400 MHz) δ (ppm): 2.54 (s, 3H), 2.89 (m, 2H), 3.54 (m, 2H), 4.21 (t, *J* = 6.72 Hz, 1H), 4.44 (d, *J* = 6.72 Hz, 2H), 4.87 (m, 1H), 7.28 (m, 3H), 7.39 (m, 3H), 7.52 (d, *J* = 7.40 Hz, 2H),

7.63 (s, 1H), 7.75 (d,  $J = 7.52$  Hz, 2H), 8.30 (d,  $J = 8.8$  Hz, 1H).

**(9H-Fluoren-9-yl)methyl 2-(1-acetyl-5-methoxy-1H-indol-3-yl)ethylcarbamate (1d).**

$^1\text{H}$  NMR ( $\text{CDCl}_3$ , 400 MHz)  $\delta$  (ppm): 2.53 (s, 3H), 2.89 (m, 2H), 3.55 (m, 2H), 3.84 (s, 3H), 4.21 (t,  $J = 6.76$  Hz, 1H), 4.42 (d,  $J = 6.76$  Hz, 2H), 4.93 (m, 1H), 6.95 (m, 2H), 7.21 (s, 1H), 7.27 (t,  $J = 7.04$  Hz, 2H), 7.38 (t,  $J = 7.44$  Hz, 2H), 7.55 (d,  $J = 7.44$  Hz, 2H), 7.75 (d,  $J = 7.04$  Hz, 2H), 8.32 (d,  $J = 7.12$ , 1H).

**(9H-Fluoren-9-yl)methyl 2-(1-acetyl-6-bromo-1H-indol-3-yl)ethylcarbamate (1e).**

$^1\text{H}$  NMR ( $\text{CDCl}_3$ , 400 MHz)  $\delta$  (ppm): 2.54 (s, 3H), 2.90 (m, 2H), 3.52 (m, 2H), 4.20 (t,  $J = 6.72$  Hz, 1H), 4.43 (d,  $J = 6.72$  Hz, 2H), 4.87 (m, 1H), 7.21 (s, 1H), 7.28 (t,  $J = 7.48$  Hz, 2H), 7.39 (m, 4H), 7.55 (d,  $J = 7.44$  Hz, 2H), 7.75 (d,  $J = 7.48$  Hz, 2H), 8.64 (s, 1H).

**(9H-Fluoren-9-yl)methyl 2-(1-acetyl-6-chloro-1H-indol-3-yl)ethylcarbamate (1f).**

$^1\text{H}$  NMR ( $\text{CDCl}_3$ , 400 MHz)  $\delta$  (ppm): 2.54 (s, 3H), 2.89 (m, 2H), 3.54 (m, 2H), 4.20 (t,  $J = 6.64$  Hz, 1H), 4.43 (d,  $J = 6.64$  Hz, 2H), 4.93 (m, 1H), 7.27 (m, 3H), 7.38 (m, 3H), 7.55 (d,  $J = 7.40$  Hz, 2H), 7.75 (m, 3H), 8.64 (s, 1H).

**General procedure for direct catalytic, asymmetric synthesis of (9H-fluoren-9-yl)methyl 8-acetyl-3a-(phenylselenyl)-3,3a,8,8a-tetrahydropyrrolo[2,3-*b*]indole-1(2H)-carboxylate**

A mixture of an *N*-phenylselenophthalimide (*N*-PSP) (0.3 mmol), catalyst **3b** (0.01 mmol, 7 mg), Fmoc-Ac-tryptamine (0.1 mmol), and 5 Å molecular sieves (100 mg) was prepared in a Schlenk tube. The tube was flushed by Argon gas three times. Then, DCE (1.0 mL) was added, and the mixture was stirred at 0 °C until the reaction was complete (the reaction time was 1–3 d, monitored by TLC). The resultant solution was purified through flash column chromatography on silica gel (eluent: petroleum ether:ethyl acetate = 8:1–4:1) to yield pure products.

**(9H-Fluoren-9-yl)methyl 8-acetyl-3a-(phenylselenyl)-3,3a,8,8a-tetrahydropyrrolo[2,3-*b*]indole-1(2H)-carboxylate (4a)**

47 mg (Flash column chromatography eluent, petroleum ether/ethyl acetate = 6/1–4/1), 71% yield,

<sup>1</sup>H NMR (CDCl<sub>3</sub>, 400 MHz) δ (ppm): 2.28 (m, 4H), 2.50 (m, 1H), 2.89 (m, 1H), 3.65 (m, 1H), 4.20 (m, 1H), 4.44 (m, 2H), 6.05 (s, 1H), 7.16 (m, 4H), 7.30 (m, 4H), 7.39 (m, 2H), 7.50 (m, 2H), 7.75 (m, 2H), 7.86 (m, 2H);

<sup>13</sup>C NMR (D-DMSO, 100 MHz) δ (ppm): 22.8, 34.6, 45.8, 46.5, 55.7, 66.7, 83.8, 115.9, 119.4, 120.0, 124.9, 125.3, 126.7, 127.0, 127.6, 129.1, 129.6, 131.5, 135.3, 136.7, 140.7, 140.8, 141.0, 143.4, 143.6, 153.6, 169.4;

Enantiomeric excess: 86%, determined by HPLC (Daicel Chirapak IA-H, hexane/isopropanol = 70/30, flow rate 1.0 mL/min, *T* = 30 °C, 254 nm ): *t<sub>R</sub>* = 11.93 min(minor), *t<sub>R</sub>* = 25.89 min(major); IR (KBr): 2921, 2858, 1740, 1709, 1652, 1507, 1362, 1248, 1166, 831, 755, 699; HRMS exact mass calcd for (C<sub>33</sub>H<sub>28</sub>N<sub>2</sub>O<sub>3</sub>Se + H)<sup>+</sup> requires *m/z* 581.1343, found 581.1337.

**(9*H*-Fluoren-9-yl)methyl 8-acetyl-6-fluoro-3a-(phenylselenyl)-3,3a,8,8a-tetrahydropyrrolo[2,3-*b*]indole-1(2*H*)-carboxylate (4b)**

52 mg (Flash column chromatography eluent, petroleum ether/ethyl acetate = 6/1–4/1), 85% yield,

<sup>1</sup>H NMR (D-DMSO, 400 MHz) δ (ppm): 2.28 (m, 4H), 2.67 (m, 2H), 3.52 (m, 1H), 4.35 (m, 3H), 5.97 (s, 1H), 7.40 (m, 11H), 7.58 (m, 3H), 7.88 (m, 2H);

<sup>13</sup>C NMR (D-DMSO, 100 MHz) δ (ppm): 22.8, 34.7, 45.7, 46.6, 66.6, 84.2, 117.3, 120.0, 124.3, 124.9, 125.3, 125.4, 127.0, 127.6, 129.1, 129.6, 131.8, 132.5, 132.8, 136.6, 140.7, 142.8, 143.4, 143.6, 153.6, 169.6;

Enantiomeric excess: 83%, determined by HPLC (Daicel Chirapak IA-H, hexane/isopropanol = 70/30, flow rate 1.0 mL/min, *T* = 30 °C, 254 nm ): *t<sub>R</sub>* = 9.14 min(minor), *t<sub>R</sub>* = 17.04 min(major); IR (KBr): 2921, 2858, 1740, 1709, 1652, 1507, 1362, 1248, 1166, 831, 755, 699; HRMS exact mass calcd for (C<sub>33</sub>H<sub>27</sub>FN<sub>2</sub>O<sub>3</sub>Se + H)<sup>+</sup> requires *m/z* 599.1244, found 599.1253.

**(9*H*-Fluoren-9-yl)methyl 8-acetyl-5-fluoro-3a-(phenylselenyl)-3,3a,8,8a-tetrahydropyrrolo[2,3-*b*]indole-1(2*H*)-carboxylate (4c)**

46 mg (Flash column chromatography eluent, petroleum ether/ethyl acetate = 6/1–4/1), 76% yield,

<sup>1</sup>H NMR (D-DMSO, 400 MHz) δ (ppm): 2.28 (m, 4H), 2.73 (m, 2H), 3.54 (m, 1H), 4.30 (m, 3H), 5.97 (s, 1H), 7.35 (m, 10H), 7.58 (m, 3H), 7.88 (m, 3H);

<sup>13</sup>C NMR (D-DMSO, 100 MHz) δ (ppm): 22.8, 34.6, 45.8, 46.5, 55.8, 66.7, 83.9, 119.0, 120.0, 122.9, 123.8, 124.9, 125.3, 127.0, 127.6, 128.1, 128.7, 129.1, 129.6, 132.6, 134.2, 136.7, 140.7,

143.4, 143.6, 153.6, 169.1;

Enantiomeric excess: 71%, determined by HPLC (Daicel Chirapak IA-H, hexane/isopropanol = 70/30, flow rate 1.0 mL/min,  $T = 30\text{ }^{\circ}\text{C}$ , 254 nm ):  $t_{\text{R}} = 11.49\text{ min}$ (minor),  $t_{\text{R}} = 24.01\text{ min}$ (major); IR (KBr): 2921, 2858, 1740, 1709, 1652, 1507, 1362, 1248, 1166, 831, 755, 699; HRMS exact mass calcd for  $(\text{C}_{33}\text{H}_{27}\text{FN}_2\text{O}_3\text{Se} + \text{H})^+$  requires  $m/z$  599.1244, found 599.1250.

**(9H-Fluoren-9-yl)methyl 8-acetyl-5-methoxy-3a-(phenylselenyl)-3,3a,8,8a-tetrahydropyrrolo[2,3-b]indole-1(2H)-carboxylate (4d)**

49 mg (Flash column chromatography eluent, petroleum ether/ethyl acetate = 6/1–4/1), 81% yield,  $^1\text{H}$  NMR ( $\text{CDCl}_3$ , 400 MHz)  $\delta$  (ppm): 2.27 (m, 4H), 2.71 (m, 2H), 3.51 (m, 1H), 3.74 (s, 3H), 4.30 (m, 3H), 5.87 (s, 1H), 6.71 (dd,  $J_1 = 2.6$ ,  $J_2 = 8.8$ , 1H), 6.95 (s, 1H), 7.32 (m, 9H), 7.57 (m, 3H), 7.88 (m, 2H);

$^{13}\text{C}$  NMR ( $\text{CDCl}_3$ , 100 MHz)  $\delta$  (ppm): 22.7, 34.7, 45.7, 46.5, 55.4, 59.7, 66.6, 83.8, 108.7, 114.5, 118.8, 120.0, 124.9, 125.7, 127.0, 127.6, 129.1, 129.5, 135.3, 136.7, 140.6, 140.7, 143.5, 143.6, 153.6, 156.4, 168.8;

Enantiomeric excess: 76%, determined by HPLC (Daicel Chirapak IA-H, hexane/isopropanol = 70/30, flow rate 1.0 mL/min,  $T = 30\text{ }^{\circ}\text{C}$ , 254 nm ):  $t_{\text{R}} = 14.16\text{ min}$ (minor),  $t_{\text{R}} = 22.71\text{ min}$ (major); IR (KBr): 2921, 2858, 1740, 1709, 1652, 1507, 1362, 1248, 1166, 831, 755, 699; HRMS exact mass calcd for  $(\text{C}_{34}\text{H}_{30}\text{N}_2\text{O}_4\text{Se} + \text{H})^+$  requires  $m/z$  611.1449, found 611.1443.

**(9H-Fluoren-9-yl)methyl 8-acetyl-6-bromo-3a-(phenylselenyl)-3,3a,8,8a-tetrahydropyrrolo[2,3-b]indole-1(2H)-carboxylate (4e)**

46 mg (Flash column chromatography eluent, petroleum ether/ethyl acetate = 6/1–4/1), 70% yield,  $^1\text{H}$  NMR (D-DMSO, 400 MHz)  $\delta$  (ppm): 2.28 (m, 4H), 2.70 (m, 2H), 3.51 (m, 1H), 4.35 (m, 3H), 5.95 (s, 1H), 7.30 (m, 12H), 7.55 (m, 2H), 7.85 (m, 2H);

$^{13}\text{C}$  NMR (D-DMSO, 100 MHz)  $\delta$  (ppm): 22.9, 34.6, 45.7, 46.6, 54.8, 66.6, 84.0, 120.0, 120.1, 121.3, 124.9, 135.3, 125.6, 127.0, 127.2, 127.6, 129.1, 129.6, 132.2, 136.7, 140.0, 140.1, 143.0, 143.4, 143.5, 153.6, 169.6;

Enantiomeric excess: 86%, determined by HPLC (Daicel Chirapak IA-H, hexane/isopropanol = 70/30, flow rate 1.0 mL/min,  $T = 30\text{ }^{\circ}\text{C}$ , 254 nm ):  $t_{\text{R}} = 11.93\text{ min}$ (minor),  $t_{\text{R}} = 25.89\text{ min}$ (major); IR (KBr): 2921, 2858, 1740, 1709, 1652, 1507, 1362, 1248, 1166, 831, 755, 699; HRMS exact mass

calcd for (C<sub>33</sub>H<sub>27</sub>BrN<sub>2</sub>O<sub>3</sub>Se + H)<sup>+</sup> requires *m/z* 659.0449, found 659.0443.

**(9*H*-Fluoren-9-yl)methyl 8-acetyl-6-chloro-3a-(phenylselenyl)-3,3a,8,8a-tetrahydropyrrolo[2,3-*b*]indole-1(2*H*)-carboxylate (4f)**

52 mg (Flash column chromatography eluent, petroleum ether/ethyl acetate = 6/1–4/1), 85% yield,

<sup>1</sup>H NMR (CDCl<sub>3</sub>, 400 MHz) δ (ppm): 2.28 (m, 4H), 2.67 (m, 2H), 3.52 (m, 1H), 4.35 (m, 3H), 5.97 (s, 1H), 7.40 (m, 11H), 7.58 (m, 3H), 7.88 (m, 2H);

<sup>13</sup>C NMR (CDCl<sub>3</sub>, 100 MHz) δ (ppm): 22.8, 34.7, 45.7, 46.6, 66.6, 84.2, 117.3, 120.0, 124.3, 124.9, 125.3, 125.4, 127.0, 127.6, 129.1, 129.6, 131.8, 132.5, 132.8, 136.6, 140.7, 142.8, 143.4, 143.6, 153.6, 169.6;

Enantiomeric excess: 89%, determined by HPLC (Daicel Chirapak IA-H, hexane/isopropanol = 70/30, flow rate 1.0 mL/min, *T* = 30 °C, 254 nm ): *t*<sub>R</sub> = 9.61 min(minor), *t*<sub>R</sub> = 20.72 min(major); IR (KBr): 2921, 2858, 1740, 1709, 1652, 1507, 1362, 1248, 1166, 831, 755, 699; HRMS exact mass calcd for (C<sub>33</sub>H<sub>27</sub>ClN<sub>2</sub>O<sub>3</sub>Se + H)<sup>+</sup> requires *m/z* 615.0954, found 615.0948.

**(9*H*-Fluoren-9-yl)methyl 8-acetyl-3a-((4-chlorophenyl)selenyl)-3,3a,8,8a-tetrahydropyrrolo[2,3-*b*]indole-1(2*H*)-carboxylate (4g)**

43 mg (Flash column chromatography eluent, petroleum ether/ethyl acetate = 6/1–4/1), 71% yield,

<sup>1</sup>H NMR (CDCl<sub>3</sub>, 400 MHz) δ (ppm): 2.28 (m, 4H), 2.73 (m, 2H), 3.54 (m, 1H), 4.30 (m, 3H), 5.97 (s, 1H), 7.35 (m, 10H), 7.58 (m, 3H), 7.88 (m, 3H);

<sup>13</sup>C NMR (CDCl<sub>3</sub>, 100 MHz) δ (ppm): 22.8, 34.6, 45.8, 46.5, 55.8, 66.7, 83.9, 119.0, 120.0, 122.9, 123.8, 124.9, 125.3, 127.0, 127.6, 128.1, 128.7, 129.1, 129.6, 132.6, 134.2, 136.7, 140.7, 143.4, 143.6, 153.6, 169.1;

Enantiomeric excess: 83%, determined by HPLC (Daicel Chirapak IA-H, hexane/isopropanol = 70/30, flow rate 1.0 mL/min, *T* = 30 °C, 254 nm ): *t*<sub>R</sub> = 12.12 min(minor), *t*<sub>R</sub> = 28.62 min(major); IR (KBr): 2921, 2858, 1740, 1709, 1652, 1507, 1362, 1248, 1166, 831, 755, 699; HRMS exact mass calcd for (C<sub>33</sub>H<sub>27</sub>ClN<sub>2</sub>O<sub>3</sub>Se + H)<sup>+</sup> requires *m/z* 615.0954, found 615.0959.

**(9*H*-Fluoren-9-yl)methyl 8-acetyl-3a-((4-fluorophenyl)selenyl)-3,3a,8,8a-tetrahydropyrrolo[2,3-*b*]indole-1(2*H*)-carboxylate (4h)**

45 mg (Flash column chromatography eluent, petroleum ether/ethyl acetate = 6/1–4/1), 74% yield,

<sup>1</sup>H NMR (CDCl<sub>3</sub>, 400 MHz) δ (ppm): 2.28 (m, 4H), 2.73 (m, 2H), 3.54 (m, 1H), 4.30 (m, 3H), 5.97 (s, 1H), 7.35 (m, 10H), 7.58 (m, 3H), 7.68 (m, 3H), 8.02(m, 1H);

<sup>13</sup>C NMR (CDCl<sub>3</sub>, 100 MHz) δ (ppm): 22.8, 34.6, 45.8, 46.5, 55.8, 66.7, 83.9, 119.0, 120.0, 122.9, 123.8, 124.9, 125.3, 127.0, 127.6, 128.1, 128.7, 129.1, 129.6, 132.6, 134.2, 136.7, 140.7, 143.4, 143.6, 153.6, 169.1;

Enantiomeric excess: 86%, determined by HPLC (Daicel Chirapak IA-H, hexane/isopropanol = 70/30, flow rate 1.0 mL/min, *T* = 30 °C, 254 nm ): *t<sub>R</sub>* = 11.83 min(minor), *t<sub>R</sub>* = 25.17 min(major); IR (KBr): 2921, 2858, 1740, 1709, 1652, 1507, 1362, 1248, 1166, 831, 755, 699; HRMS exact mass calcd for (C<sub>33</sub>H<sub>27</sub>FN<sub>2</sub>O<sub>3</sub>S e+ H)<sup>+</sup> requires *m/z* 599.1244, found 599.1240.

**(9*H*-Fluoren-9-yl)methyl 8-acetyl-3a-((4-ethoxyphenyl)selenyl)-3,3a,8,8a-tetrahydropyrrolo[2,3-*b*]indole-1(2*H*)-carboxylate (4i)**

40 mg (Flash column chromatography eluent, petroleum ether/ethyl acetate = 6/1–4/1), 65% yield,

<sup>1</sup>H NMR (CDCl<sub>3</sub>, 400 MHz) δ (ppm): 1.35 (t, *J* = 6.96, 3H), 2.40 (m, 5H), 2.73 (m, 1H), 3.91 (m, 1H), 3.94 (q, *J* = 6.96, 2H), 4.30 (m, 3H), 5.97 (s, 1H), 7.35 (m, 10H), 7.58 (m, 3H), 7.88 (m, 3H);

<sup>13</sup>C NMR (CDCl<sub>3</sub>, 100 MHz) δ (ppm): 14.6, 26.9, 46.0, 47.1, 63.5, 67.4, 115.3, 116.6, 118.8, 120.0, 123.4, 123.5, 124.6, 124.9, 127.0, 127.1, 127.7, 129.1, 132.7, 134.2, 138.6, 141.3, 142.6, 143.7, 154.4, 160.2, 168.1;

Enantiomeric excess: 84%, determined by HPLC (Daicel Chirapak IA-H, hexane/isopropanol = 70/30, flow rate 1.0 mL/min, *T* = 30 °C, 254 nm ): *t<sub>R</sub>* = 10.50 min(minor), *t<sub>R</sub>* = 20.84 min(major); IR (KBr): 2921, 2858, 1740, 1709, 1652, 1507, 1362, 1248, 1166, 831, 755, 699; HRMS exact mass calcd for (C<sub>35</sub>H<sub>32</sub>N<sub>2</sub>O<sub>4</sub>Se + H)<sup>+</sup> requires *m/z* 625.1500, found 625.1496.

**Directly catalytic asymmetric synthesis of (3a*S*,8a*R*)-(9*H*-fluoren-9-yl)methyl 8-acetyl-3a-(phenylselenyl)-3,3a,8,8a-tetrahydropyrrolo[2,3-*b*]indole-1(2*H*)-carboxylate (4a).**

A mixture of *N*-phenylselenophthalimide (*N*-PSP) (3 mmol, 902 mg), catalyst **3b** (0.1 mmol, 70 mg), Fmoc-Ac-tryptamine (2 mmol, 850 mg), and 5 Å molecular sieves (500 mg) was added to a Schlenk tube, and the tube was flushed with argon gas three times. Then, the DCE (20 mL) was added at 0 °C. The reaction mixture was stirred at 0 °C until the reaction was complete (the reaction time was 5 d, monitored by TLC). The reaction mixture was extracted with CH<sub>2</sub>Cl<sub>2</sub> (3 × 20 mL). The combined organic layers were dried over anhydrous Na<sub>2</sub>SO<sub>4</sub>, and concentrated in vacuo. The

residue was purified by flash column chromatography (petroleum ether:ethyl acetate = 6:1–4:1) on silica gel to give the product **4a** (930 mg, 80% yield, 82% ee). After a single recrystallization from methanol, the product **4a** was obtained in 50% yield and with 97% ee.

**Synthesis of (3a*S*,8a*R*)-(9*H*-fluoren-9-yl)methyl 8-acetyl-3a-hydroxy-3,3a,8,8a-tetrahydropyrrolo[2,3-*b*]indole-1(2*H*)-carboxylate (**5**).**

To a solution of **4a** (500 mg, 0.86 mmol) and K<sub>2</sub>CO<sub>3</sub> (469 mg, 3.4 mmol) in DCM (30 mL) was added wet MCPBA (70%) (1.0 g, 5 mmol) at room temperature. Afterward, the reaction was stirred at room temperature for 10 mins, brine was added, and then the crude mixture was extracted with CH<sub>2</sub>Cl<sub>2</sub> (2 × 20 mL). The combined organic layers were washed with brine and dried over anhydrous Na<sub>2</sub>SO<sub>4</sub>. After concentration under reduced pressure, the residue obtained was purified by column chromatography (petroleum ether:ethyl acetate = 1:1) to afford the title compound **5** (360 mg, 95%).

<sup>1</sup>H NMR (CDCl<sub>3</sub>, 400 MHz) δ (ppm): 2.64 (m, 6H), 3.61 (m, 1H), 4.20 (m, 1H), 4.49 (m, 2H), 6.05 (s, 1H), 7.2(m, 1H), 7.45 (m, 6H), 7.58 (m, 2H), 7.88 (m, 2H), 8.02 (m, 1H);

<sup>13</sup>C NMR (CDCl<sub>3</sub>, 100 MHz) δ (ppm): 23.4, 39.6, 46.4, 47.2, 67.5, 84.6, 119.1, 120.0, 123.2, 123.5, 124.8, 125.2, 127.1, 127.2, 127.8, 127.9, 130.8, 134.2, 141.3, 141.4, 142.4, 143.5, 154.4, 168.1, 170.8;

IR (KBr): 2930, 2854, 1745, 1740, 1652, 1507, 1362, 1248, 1166, 852, 840, 689; HRMS exact mass calcd for (C<sub>27</sub>H<sub>24</sub>N<sub>2</sub>O<sub>4</sub> + H)<sup>+</sup> requires *m/z* 441.1809, found 441.1811.



## X-ray single crystal data for 4a

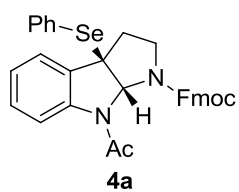

(3*aR*,8*aS*)-(9*H*-fluoren-9-yl)methyl 8-acetyl-3*a*-(phenylselenanyl)-3,3*a*,8,8*a*-tetrahydropyrrolo[2,3-*b*]indole-1(2*H*)-carboxylate

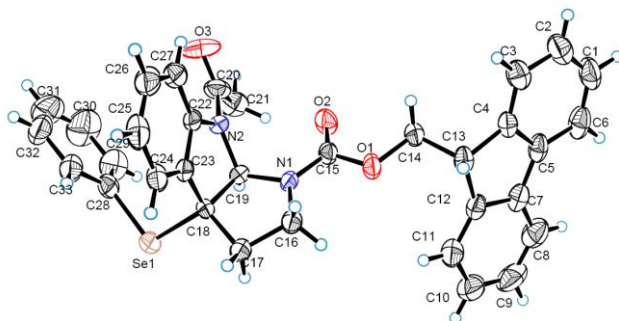

---

Bond precision: C-C = 0.0059 A                      Wavelength=0.71073

Cell:                      a=9.3282(3)                      b=16.0584(6)                      c=18.4981(6)

                            alpha=90                      beta=90                      gamma=90

Temperature:              291 K

|                | Calculated       | Reported         |
|----------------|------------------|------------------|
| Volume         | 2770.94(16)      | 2770.94(16)      |
| Space group    | P 21 21 21       | P 21 21 21       |
| Hall group     | P 2ac 2ab        | ?                |
| Moiety formula | C33 H28 N2 O3 Se | ?                |
| Sum formula    | C33 H28 N2 O3 Se | C33 H28 N2 O3 Se |
| Mr             | 579.53           | 579.53           |
| Dx,g cm-3      | 1.389            | 1.389            |
| Z              | 4                | 4                |
| Mu (mm-1)      | 1.392            | 1.392            |
| F000           | 1192.0           | 1192.0           |
| F000'          | 1192.07          |                  |
| h,k,lmax       | 10,18,21         | 10,18,21         |
| Nref           | 2672 [ 4705]     | 4695             |
| Tmin,Tmax      | 0.571,0.641      | 0.599,0.664      |
| Tmin'          | 0.560            |                  |

Correction method= MULTI-SCAN

Data completeness= 1.76/1.00                      Theta(max)= 24.690

R(reflections)= 0.0419( 3828)                      wR2(reflections)= 0.0735( 4695)

S = 1.024                      Npar= 353

---

## SAMPLE INFORMATION

|                                      |                             |                                       |
|--------------------------------------|-----------------------------|---------------------------------------|
| Sample Name: se-Fmoc_mg100_psp-ia30% | Acquired By: System         | Date Acquired: 5/30/2011 11:40:34 AM  |
| Sample Type: Unknown                 | Acq. Method: wq1_30%        | Date Processed: 1/14/2012 12:00:48 AM |
| Vial: 1                              | Channel Name: 2487Channel 1 | Sample Set Name:                      |
| Injection #: 4                       |                             |                                       |
| Injection Volume: 20.00 ul           |                             |                                       |
| Run Time: 70.00 Minutes              |                             |                                       |

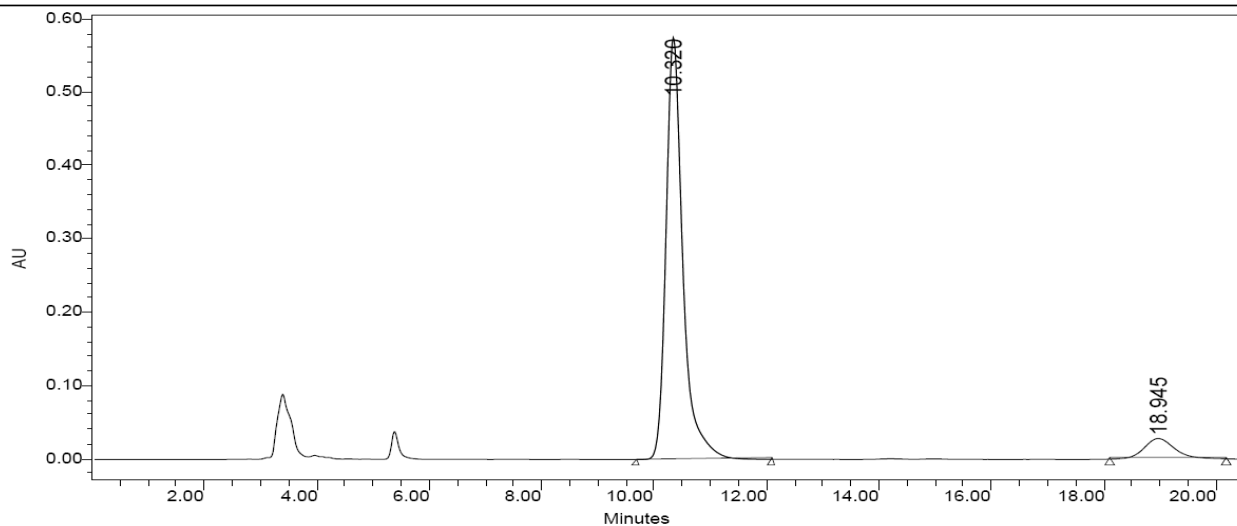

|   | RT (min) | Area (V*sec) | % Area | Height (V) | % Height |
|---|----------|--------------|--------|------------|----------|
| 1 | 10.320   | 11992518     | 91.87  | 575216     | 95.37    |
| 2 | 18.945   | 1061698      | 8.13   | 27900      | 4.63     |

## SAMPLE INFORMATION

|                             |                             |                                      |
|-----------------------------|-----------------------------|--------------------------------------|
| Sample Name: se-1crys-IA30% | Acquired By: System         | Date Acquired: 9/12/2011 8:52:09 PM  |
| Sample Type: Unknown        | Acq. Method: wq1_30%        | Date Processed: 4/10/2013 4:41:32 AM |
| Vial: 1                     | Channel Name: 2487Channel 1 | Sample Set Name:                     |
| Injection #: 1              |                             |                                      |
| Injection Volume: 20.00 ul  |                             |                                      |
| Run Time: 70.00 Minutes     |                             |                                      |

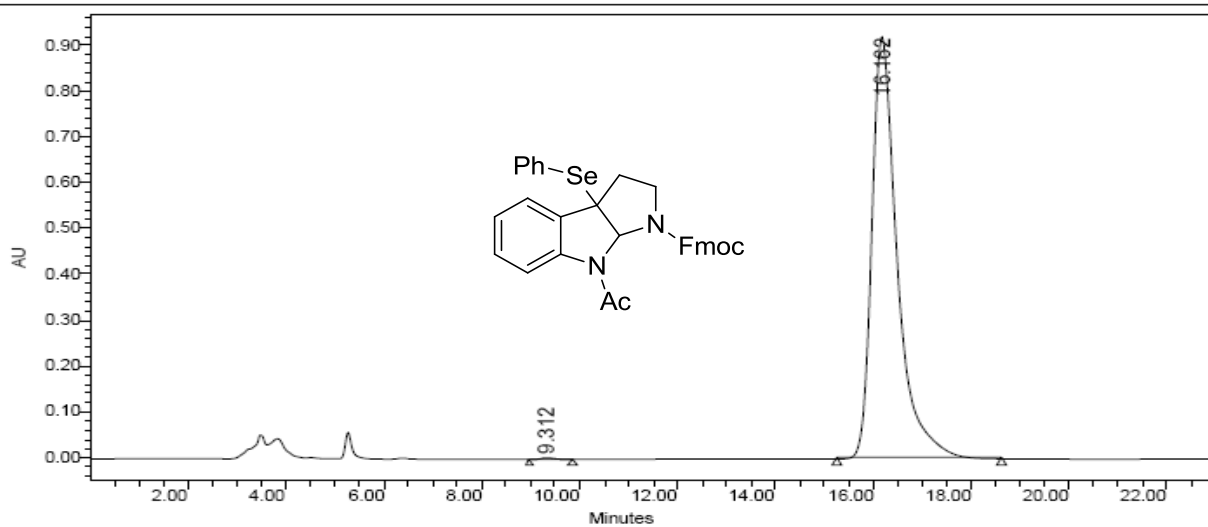

|   | RT (min) | Area (V*sec) | % Area | Height (V) | % Height |
|---|----------|--------------|--------|------------|----------|
| 1 | 9.312    | 54714        | 0.16   | 2925       | 0.32     |
| 2 | 16.162   | 33277304     | 99.84  | 920049     | 99.68    |

### SAMPLE INFORMATION

Sample Name: se-s-p-5f\_DL-IA30%  
 Sample Type: Unknown  
 Vial: 1  
 Injection #: 7  
 Injection Volume: 20.00 ul  
 Run Time: 70.00 Minutes

Acquired By: System  
 Date Acquired: 1/14/2012 2:16:34 AM  
 Acq. Method: wq1\_30%  
 Date Processed: 1/14/2012 4:14:27 AM  
 Channel Name: 2487Channel 1  
 Sample Set Name:

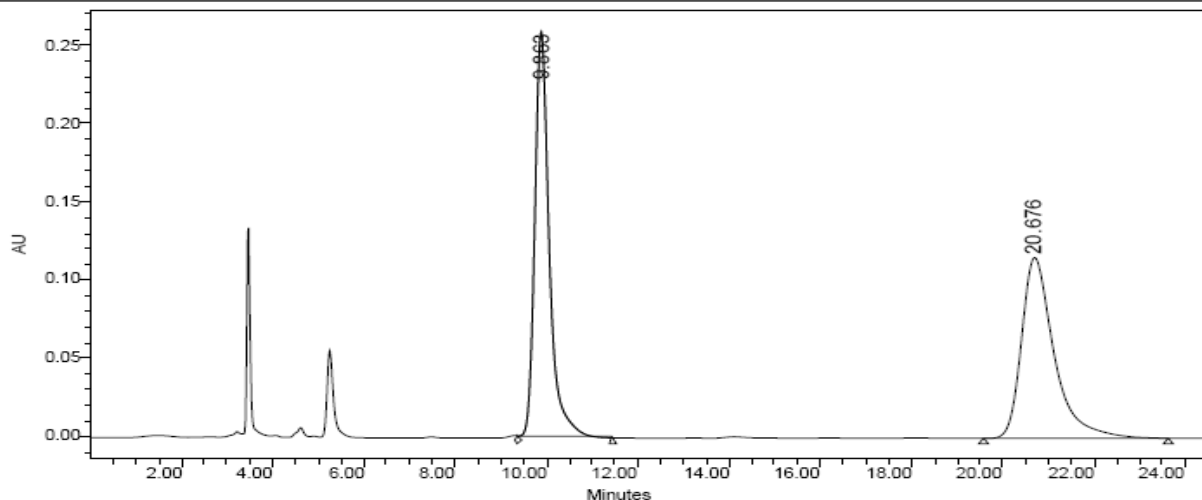

|   | RT (min) | Area (V*sec) | % Area | Height (V) | % Height |
|---|----------|--------------|--------|------------|----------|
| 1 | 9.863    | 5771014      | 50.12  | 259579     | 69.20    |
| 2 | 20.676   | 5742579      | 49.88  | 115539     | 30.80    |

### SAMPLE INFORMATION

Sample Name: se-s-p-5f\_p-IA30%  
 Sample Type: Unknown  
 Vial: 1  
 Injection #: 10  
 Injection Volume: 20.00 ul  
 Run Time: 70.00 Minutes

Acquired By: System  
 Date Acquired: 1/14/2012 3:45:42 AM  
 Acq. Method: wq1\_30%  
 Date Processed: 1/14/2012 4:12:47 AM  
 Channel Name: 2487Channel 1  
 Sample Set Name:

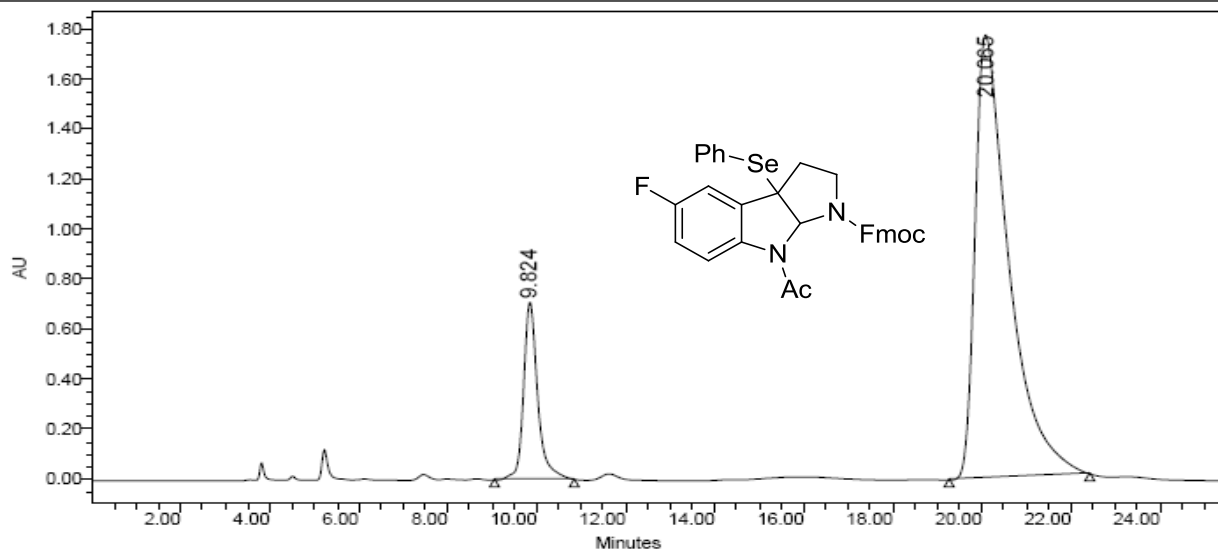

|   | RT (min) | Area (V*sec) | % Area | Height (V) | % Height |
|---|----------|--------------|--------|------------|----------|
| 1 | 9.824    | 15793333     | 14.33  | 711276     | 28.61    |
| 2 | 20.065   | 94409210     | 85.67  | 1775170    | 71.39    |

### SAMPLE INFORMATION

Sample Name: se-5-5OMe\_DL-IA30%  
 Sample Type: Unknown  
 Vial: 1  
 Injection #: 3  
 Injection Volume: 20.00 ul  
 Run Time: 70.00 Minutes

Acquired By: System  
 Date Acquired: 9/9/2011 12:22:10 AM  
 Acq. Method: wq1\_30%  
 Date Processed: 9/9/2011 12:53:51 AM  
 Channel Name: 2487Channel 1  
 Sample Set Name:

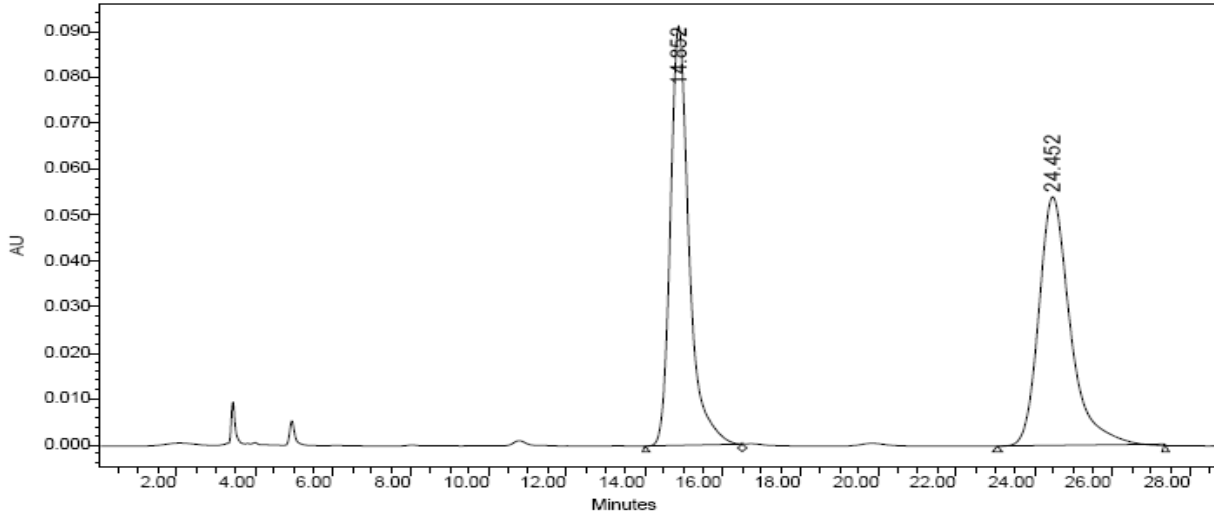

|   | RT (min) | Area (V*sec) | % Area | Height (V) | % Height |
|---|----------|--------------|--------|------------|----------|
| 1 | 14.852   | 3064978      | 50.02  | 91281      | 62.75    |
| 2 | 24.452   | 3062855      | 49.98  | 54189      | 37.25    |

### SAMPLE INFORMATION

Sample Name: se-fmoc-5OMe\_35-ia30%  
 Sample Type: Unknown  
 Vial: 1  
 Injection #: 2  
 Injection Volume: 20.00 ul  
 Run Time: 70.00 Minutes

Acquired By: System  
 Date Acquired: 6/21/2011 11:05:18 AM  
 Acq. Method: wq1\_30%  
 Date Processed: 1/13/2012 11:49:07 PM  
 Channel Name: 2487Channel 1  
 Sample Set Name:

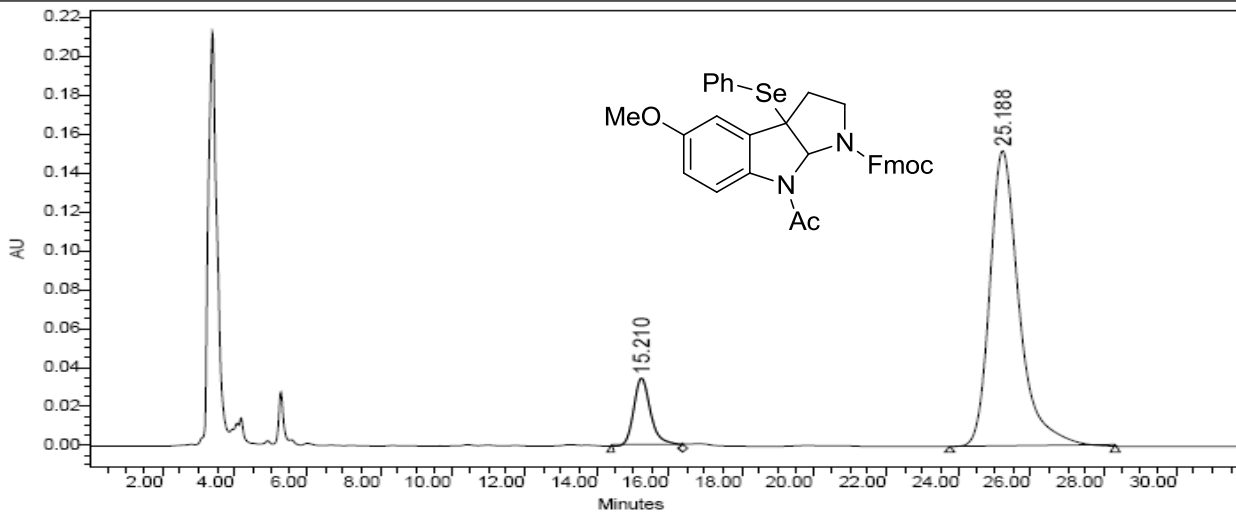

|   | RT (min) | Area (V*sec) | % Area | Height (V) | % Height |
|---|----------|--------------|--------|------------|----------|
| 1 | 15.210   | 1171982      | 12.00  | 35057      | 18.72    |
| 2 | 25.188   | 8592794      | 88.00  | 152229     | 81.28    |

### SAMPLE INFORMATION

Sample Name: se-s-p-6cl\_DL-IA30%  
 Sample Type: Unknown  
 Vial: 1  
 Injection #: 5  
 Injection Volume: 20.00 ul  
 Run Time: 70.00 Minutes

Acquired By: System  
 Date Acquired: 1/14/2012 1:31:58 AM  
 Acq. Method: wq1\_30%  
 Date Processed: 1/14/2012 1:58:13 AM  
 Channel Name: 2487Channel 1  
 Sample Set Name:

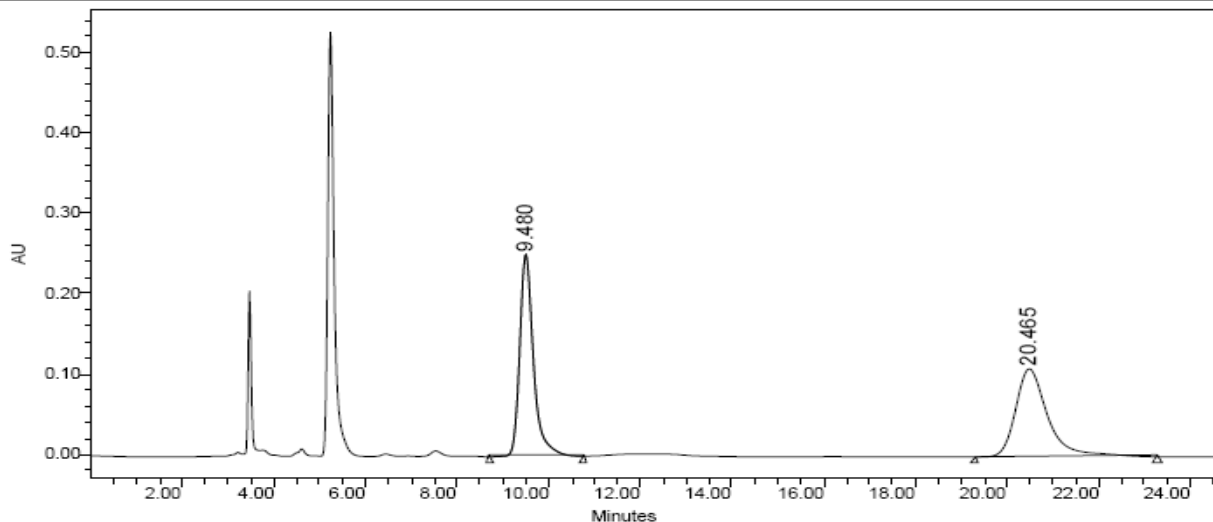

|   | RT (min) | Area (V*sec) | % Area | Height (V) | % Height |
|---|----------|--------------|--------|------------|----------|
| 1 | 9.480    | 5259255      | 49.45  | 250859     | 69.63    |
| 2 | 20.465   | 5376157      | 50.55  | 109434     | 30.37    |

### SAMPLE INFORMATION

Sample Name: se-s-p-6CL2-IA30%  
 Sample Type: Unknown  
 Vial: 1  
 Injection #: 1  
 Injection Volume: 20.00 ul  
 Run Time: 70.00 Minutes

Acquired By: System  
 Date Acquired: 1/7/2012 11:02:07 AM  
 Acq. Method: wq1\_30%  
 Date Processed: 1/13/2012 11:49:07 PM  
 Channel Name: 2487Channel 1  
 Sample Set Name:

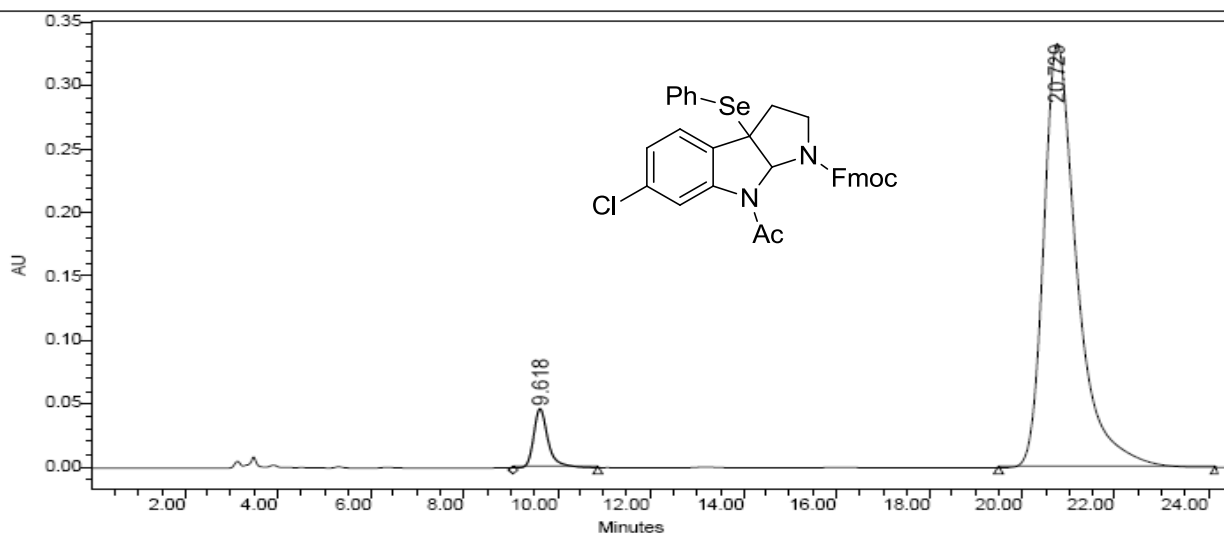

|   | RT (min) | Area (V*sec) | % Area | Height (V) | % Height |
|---|----------|--------------|--------|------------|----------|
| 1 | 9.618    | 1013416      | 5.77   | 46608      | 12.26    |
| 2 | 20.729   | 16535420     | 94.23  | 333508     | 87.74    |

### SAMPLE INFORMATION

Sample Name: se-5-6f\_DL-IA30%  
 Sample Type: Unknown  
 Vial: 1  
 Injection #: 1  
 Injection Volume: 20.00 ul  
 Run Time: 70.00 Minutes

Acquired By: System  
 Date Acquired: 9/8/2011 5:57:08 PM  
 Acq. Method: wq1\_30%  
 Date Processed: 9/8/2011 6:18:14 PM  
 Channel Name: 2487Channel 1  
 Sample Set Name:

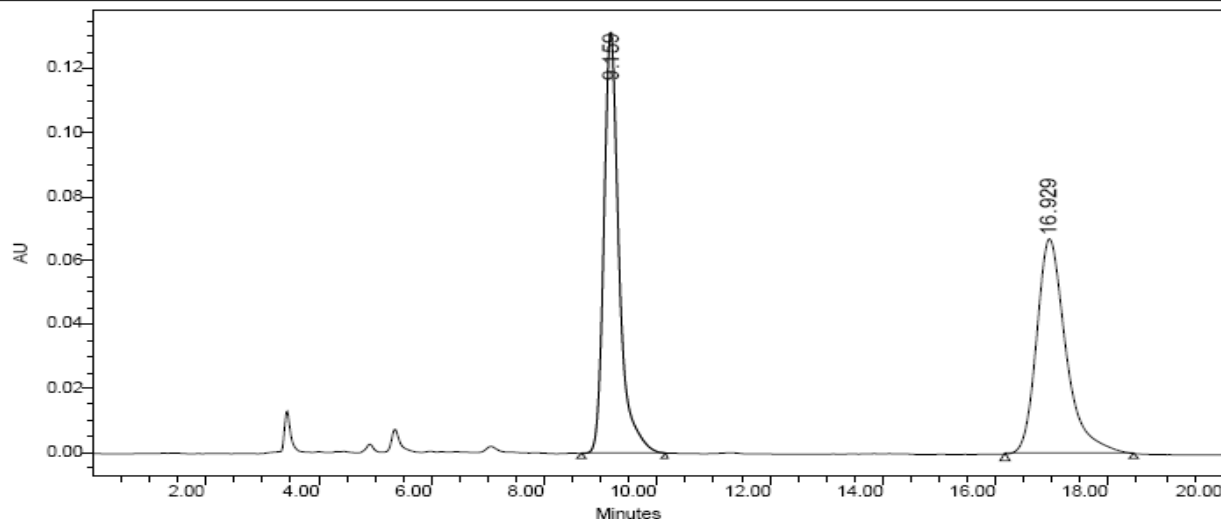

|   | RT (min) | Area (V*sec) | % Area | Height (V) | % Height |
|---|----------|--------------|--------|------------|----------|
| 1 | 9.159    | 2459343      | 50.24  | 131894     | 66.22    |
| 2 | 16.929   | 2435914      | 49.76  | 67269      | 33.78    |

### SAMPLE INFORMATION

Sample Name: se-s-p-6f\_ia30%  
 Sample Type: Unknown  
 Vial: 1  
 Injection #: 1  
 Injection Volume: 20.00 ul  
 Run Time: 70.00 Minutes

Acquired By: System  
 Date Acquired: 12/28/2011 9:34:50 AM  
 Acq. Method: wq1\_30%  
 Date Processed: 1/13/2012 11:49:07 PM  
 Channel Name: 2487Channel 1  
 Sample Set Name:

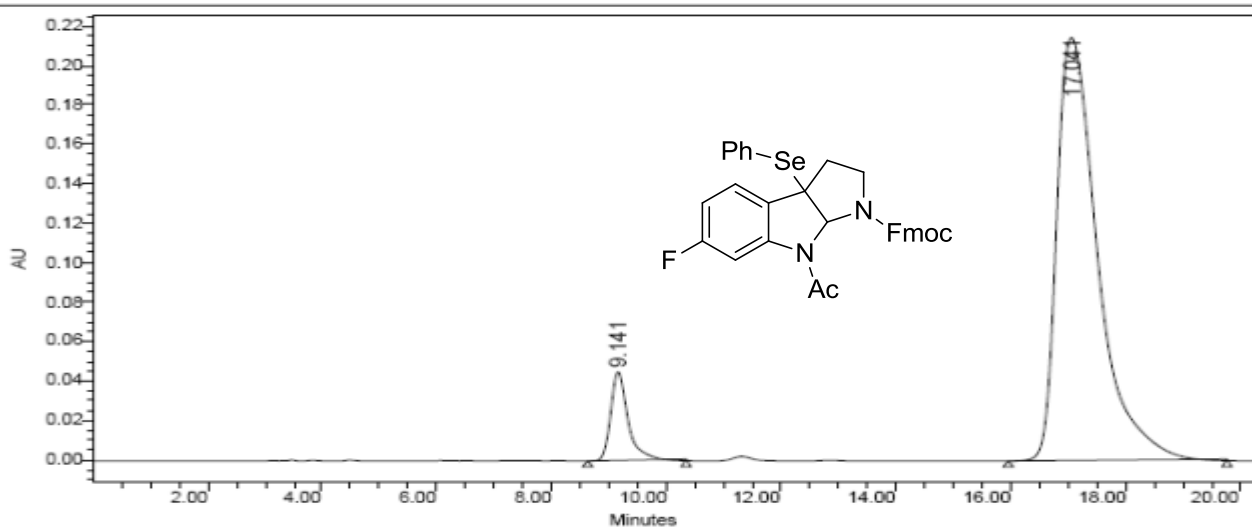

|   | RT (min) | Area (V*sec) | % Area | Height (V) | % Height |
|---|----------|--------------|--------|------------|----------|
| 1 | 9.141    | 963902       | 8.31   | 45085      | 17.37    |
| 2 | 17.041   | 10638230     | 91.69  | 214448     | 82.63    |

## SAMPLE INFORMATION

Sample Name: se-5-6Br\_DL-IA30%  
 Sample Type: Unknown  
 Vial: 1  
 Injection #: 5  
 Injection Volume: 20.00 ul  
 Run Time: 70.00 Minutes

Acquired By: System  
 Date Acquired: 9/9/2011 1:21:23 AM  
 Acq. Method: wq1\_30%  
 Date Processed: 9/9/2011 1:49:31 AM  
 Channel Name: 2487Channel 1  
 Sample Set Name:

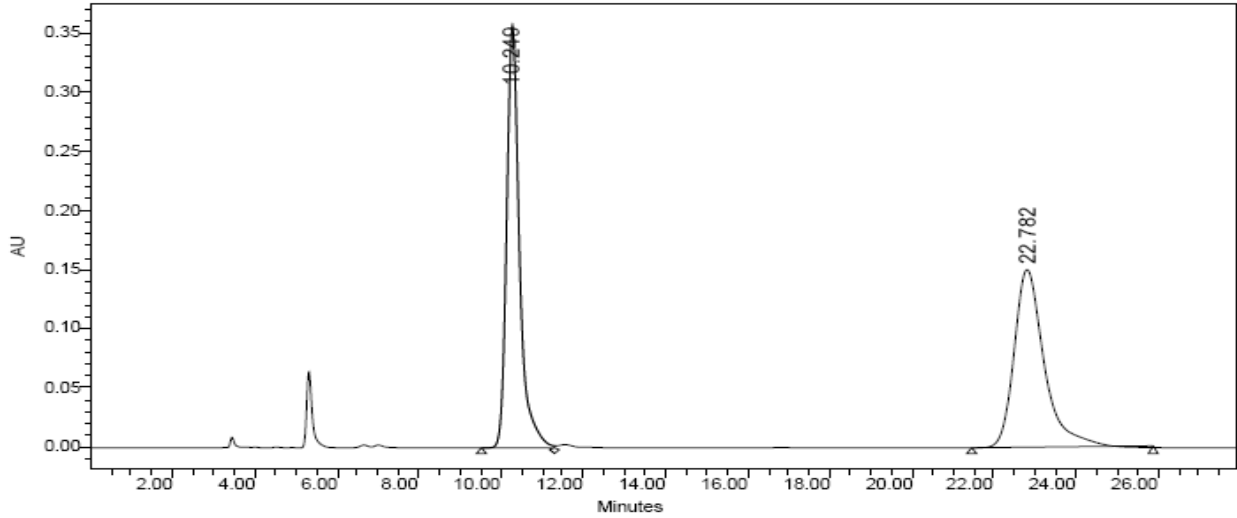

|   | RT (min) | Area (V*sec) | % Area | Height (V) | % Height |
|---|----------|--------------|--------|------------|----------|
| 1 | 10.249   | 7745582      | 49.88  | 356691     | 70.29    |
| 2 | 22.782   | 7783560      | 50.12  | 150765     | 29.71    |

## SAMPLE INFORMATION

Sample Name: p-6b\_ia30%  
 Sample Type: Unknown  
 Vial: 1  
 Injection #: 1  
 Injection Volume: 20.00 ul  
 Run Time: 70.00 Minutes

Acquired By: System  
 Date Acquired: 10/30/2011 10:45:35 AM  
 Acq. Method: wq1\_30%  
 Date Processed: 1/14/2012 12:49:54 AM  
 Channel Name: 2487Channel 1  
 Sample Set Name:

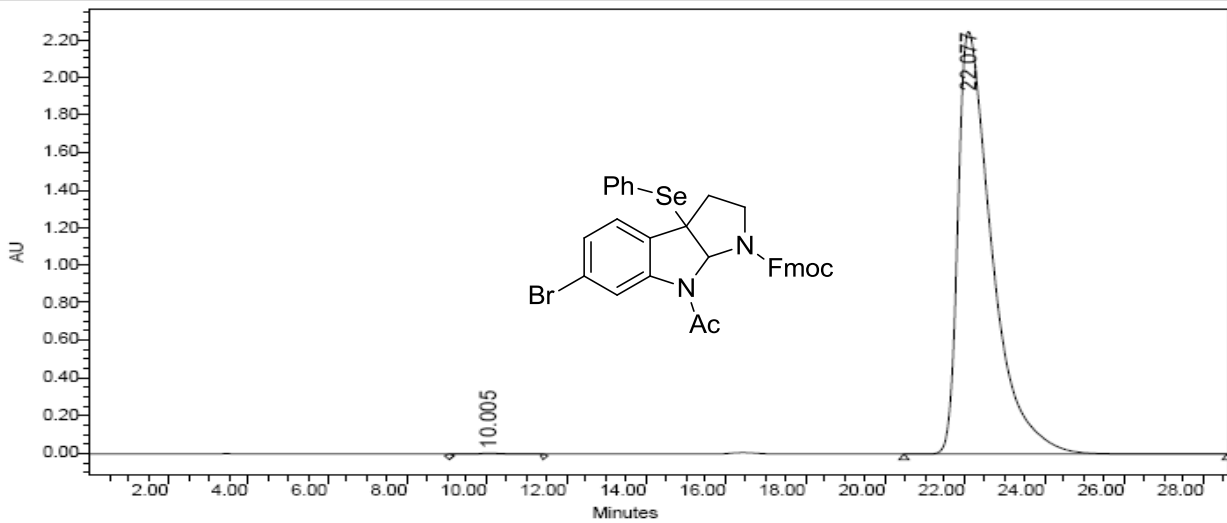

|   | RT (min) | Area (V*sec) | % Area | Height (V) | % Height |
|---|----------|--------------|--------|------------|----------|
| 1 | 10.005   | 207023       | 0.15   | 4929       | 0.22     |
| 2 | 22.077   | 133490012    | 99.85  | 2251855    | 99.78    |



### SAMPLE INFORMATION

Sample Name: se-x-4f\_ia30%dl  
 Sample Type: Unknown  
 Vial: 1  
 Injection #: 5  
 Injection Volume: 20.00 ul  
 Run Time: 70.00 Minutes

Acquired By: System  
 Date Acquired: 4/3/2013 10:45:02 PM  
 Acq. Method: wq1\_30%  
 Date Processed: 4/4/2013 1:15:47 AM  
 Channel Name: 2487Channel 1  
 Sample Set Name:

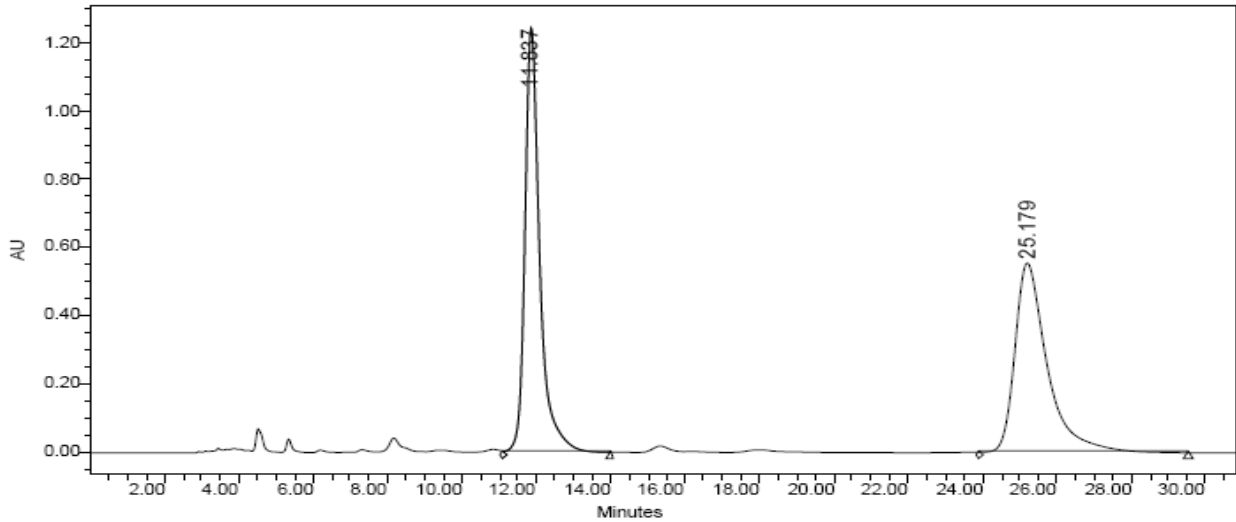

|   | RT (min) | Area (V*sec) | % Area | Height (V) | % Height |
|---|----------|--------------|--------|------------|----------|
| 1 | 11.837   | 34506818     | 50.48  | 1245641    | 69.11    |
| 2 | 25.179   | 33854538     | 49.52  | 556723     | 30.89    |

### SAMPLE INFORMATION

Sample Name: se-x-2f\_ia30%p  
 Sample Type: Unknown  
 Vial: 1  
 Injection #: 2  
 Injection Volume: 20.00 ul  
 Run Time: 70.00 Minutes

Acquired By: System  
 Date Acquired: 4/3/2013 9:26:19 PM  
 Acq. Method: wq1\_30%  
 Date Processed: 4/4/2013 1:18:37 AM  
 Channel Name: 2487Channel 1  
 Sample Set Name:

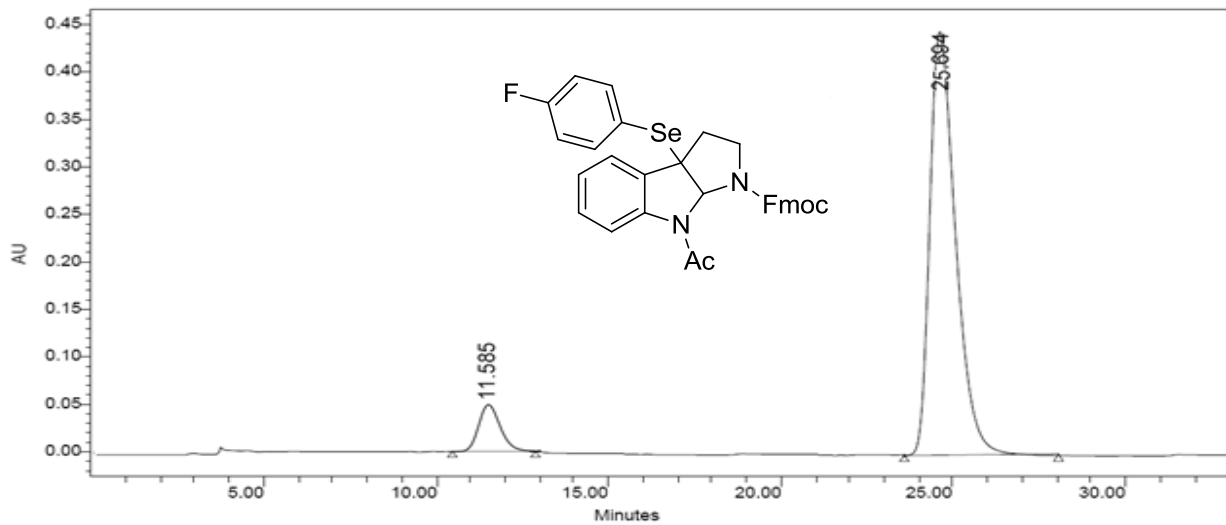

|   | RT (min) | Area (V*sec) | % Area | Height (V) | % Height |
|---|----------|--------------|--------|------------|----------|
| 1 | 11.585   | 808371       | 8.52   | 41793      | 9.98     |
| 2 | 25.694   | 8677755      | 91.48  | 377147     | 90.02    |

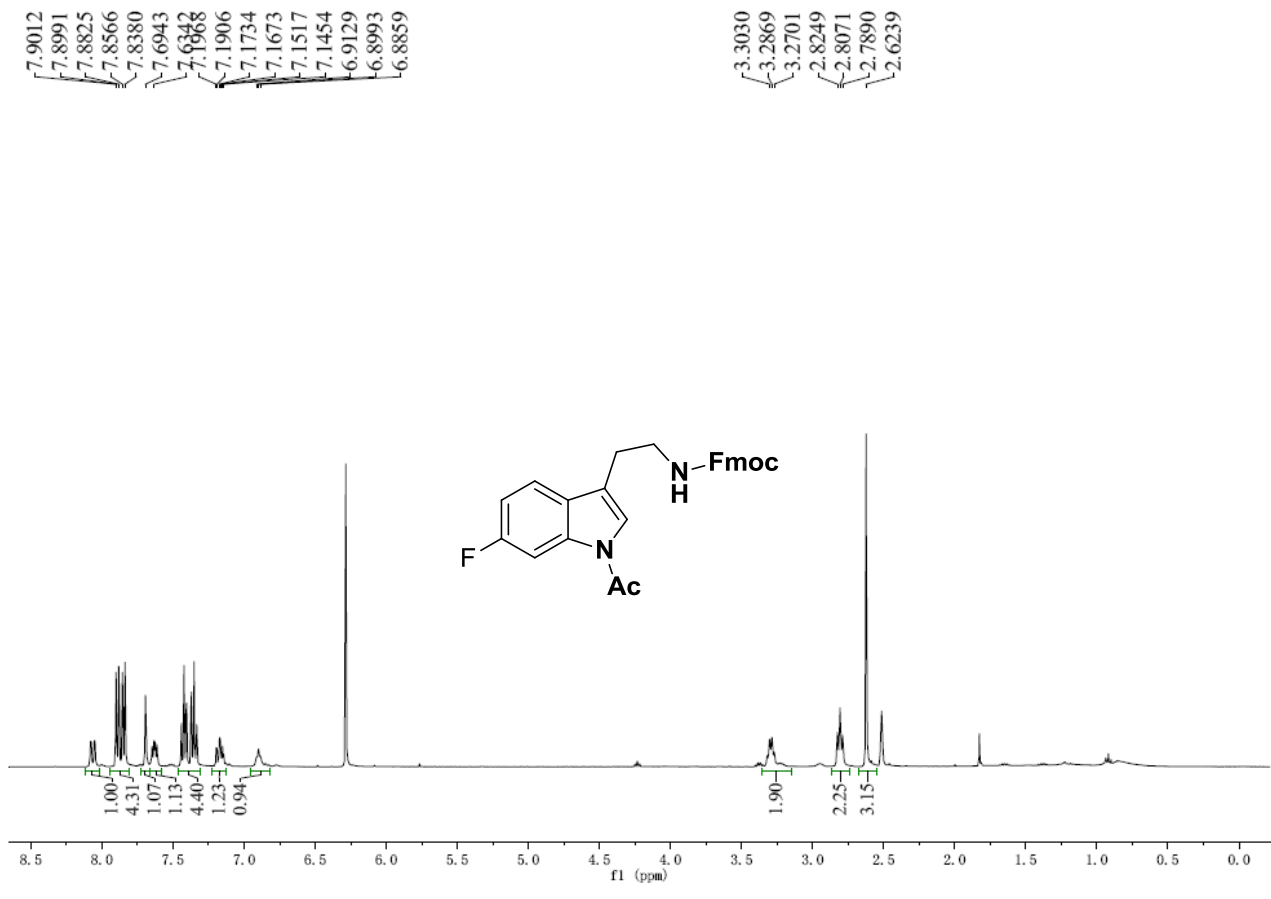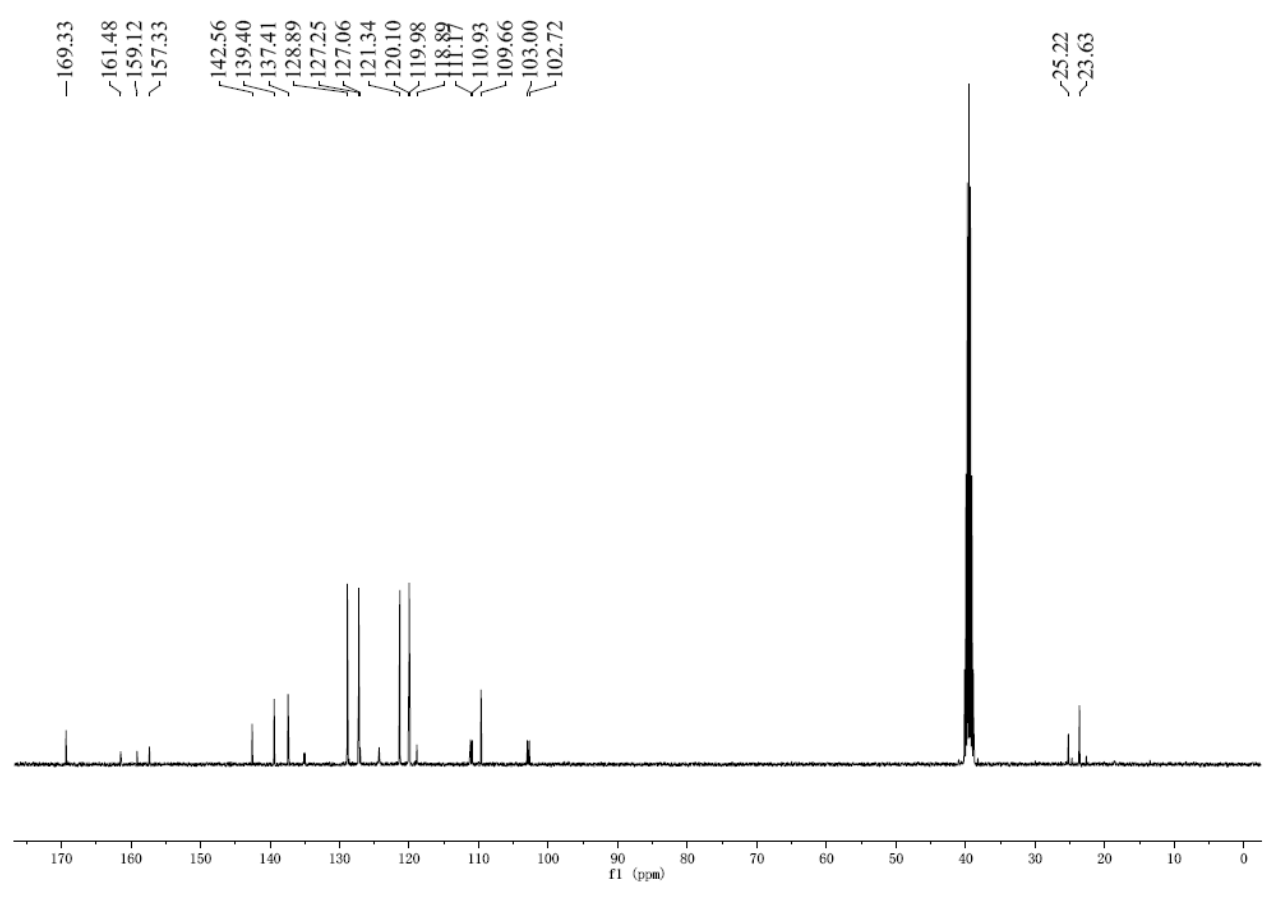

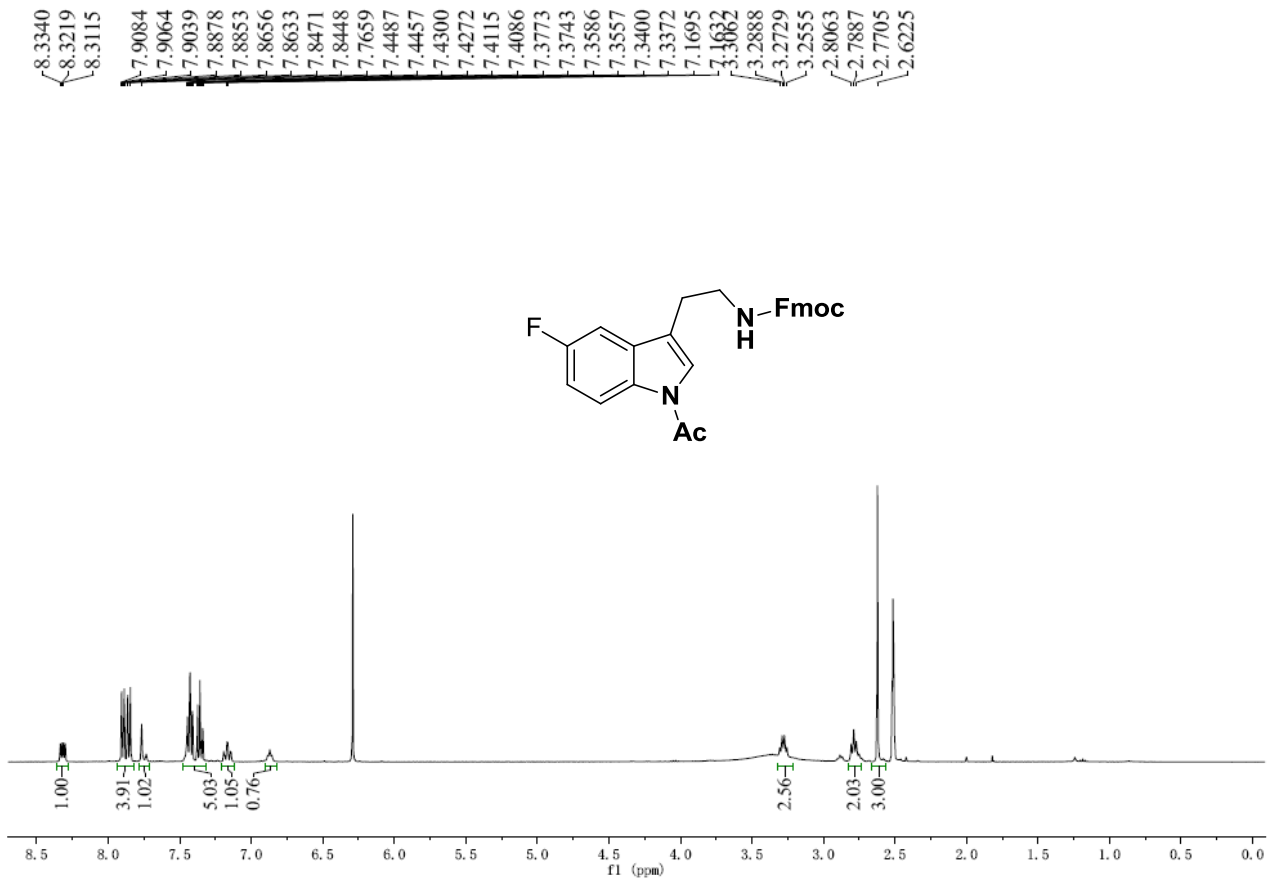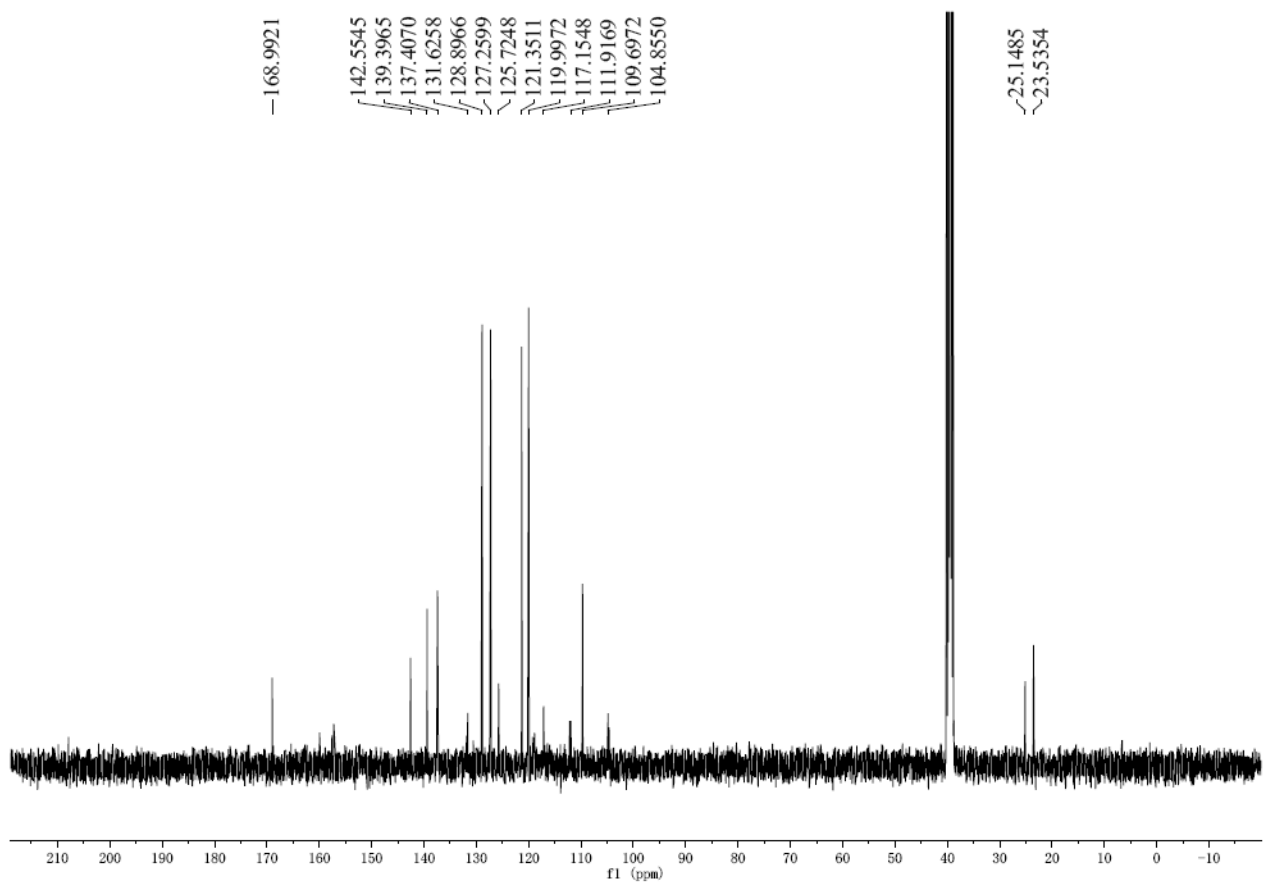

8.2334  
8.2114  
7.8847  
7.8661  
7.8352  
7.8167  
7.6304  
7.4302  
7.4120  
7.3936  
7.3594  
7.3411  
7.3229  
7.1636  
7.1593  
6.9406  
6.9232

-3.8202  
-3.3294  
-3.3174  
-2.8138  
-2.5884

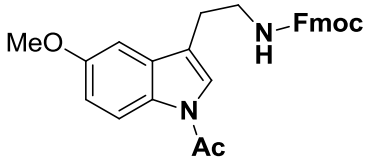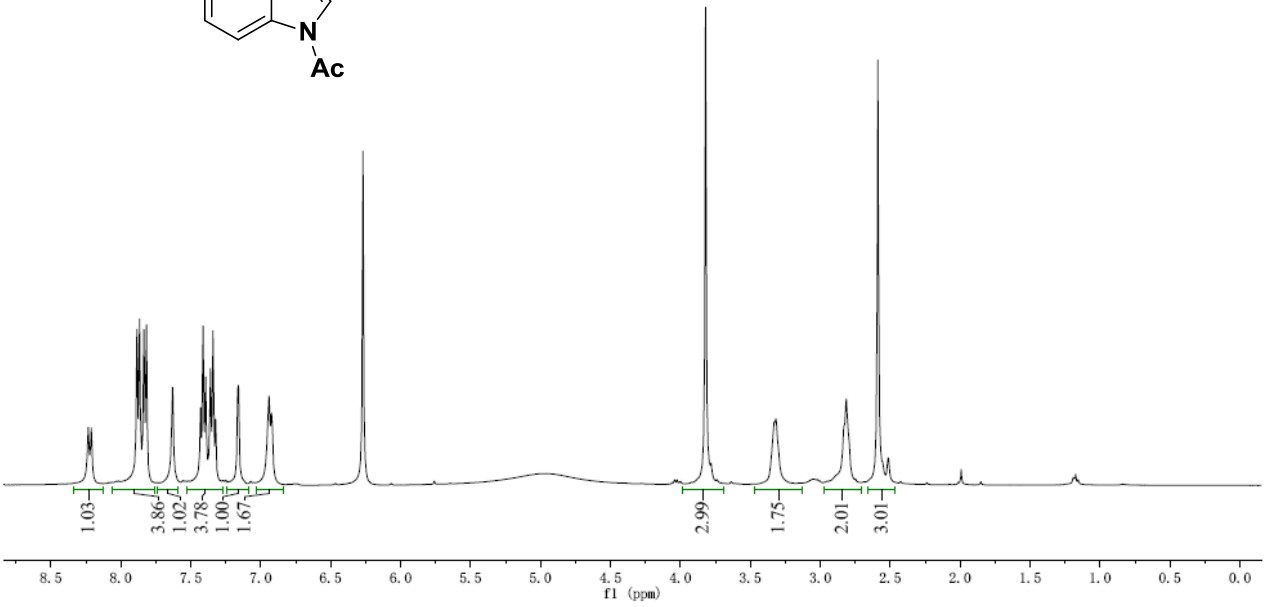

-168.58  
157.74  
155.88  
142.57  
139.40  
137.41  
131.62  
129.77  
128.87  
127.24  
124.33  
121.32  
119.95  
119.11  
116.67  
112.82  
109.58  
101.94

-55.31

25.36  
23.43

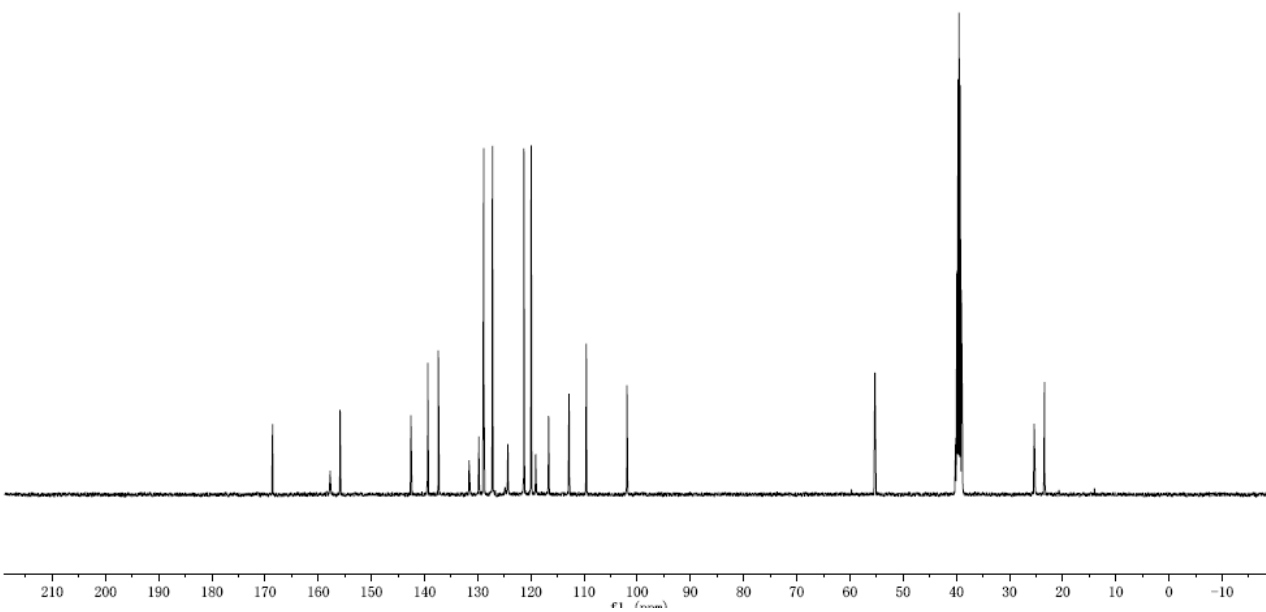

8.4967  
8.4930  
7.8994  
7.8808  
7.4246  
7.4218  
7.3533  
7.3505  
6.9072  
6.8930  
6.8790

3.3151  
3.2984  
3.2824  
2.8205  
2.8033  
2.7857  
2.6263

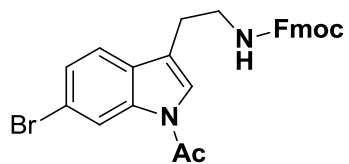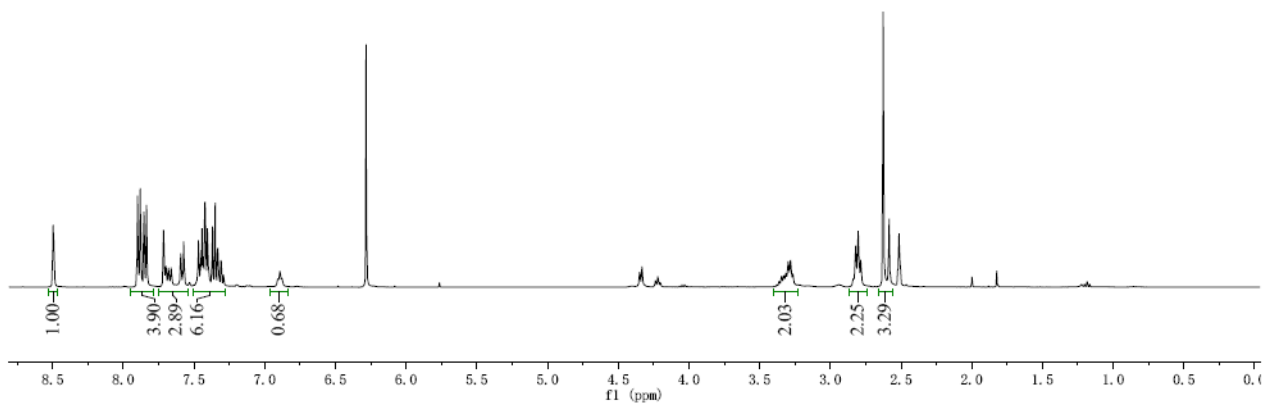

169.37  
157.28  
142.56  
139.40  
137.41  
135.72  
128.88  
127.25  
125.99  
124.73  
121.34  
120.72  
119.98  
118.46  
117.35  
109.68

25.11  
23.65

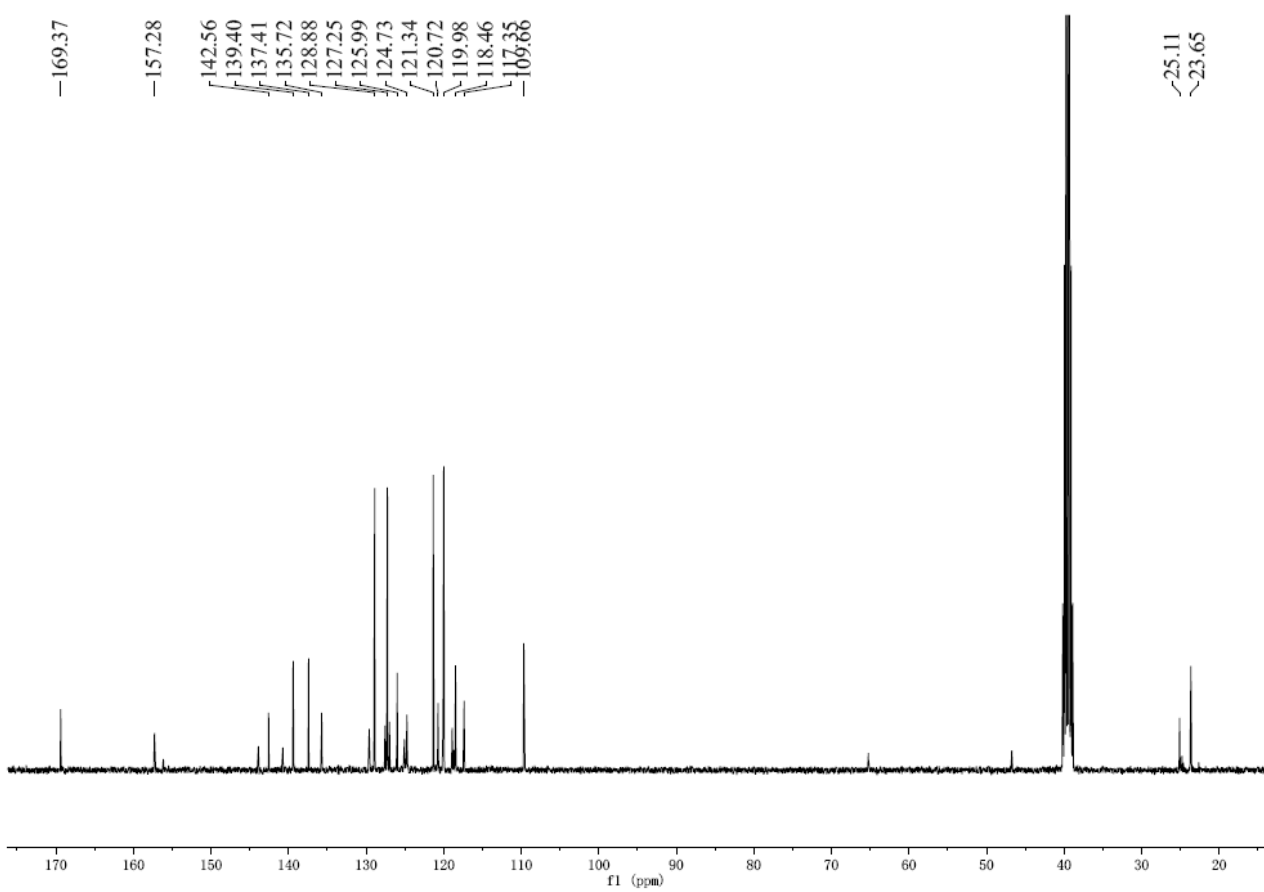

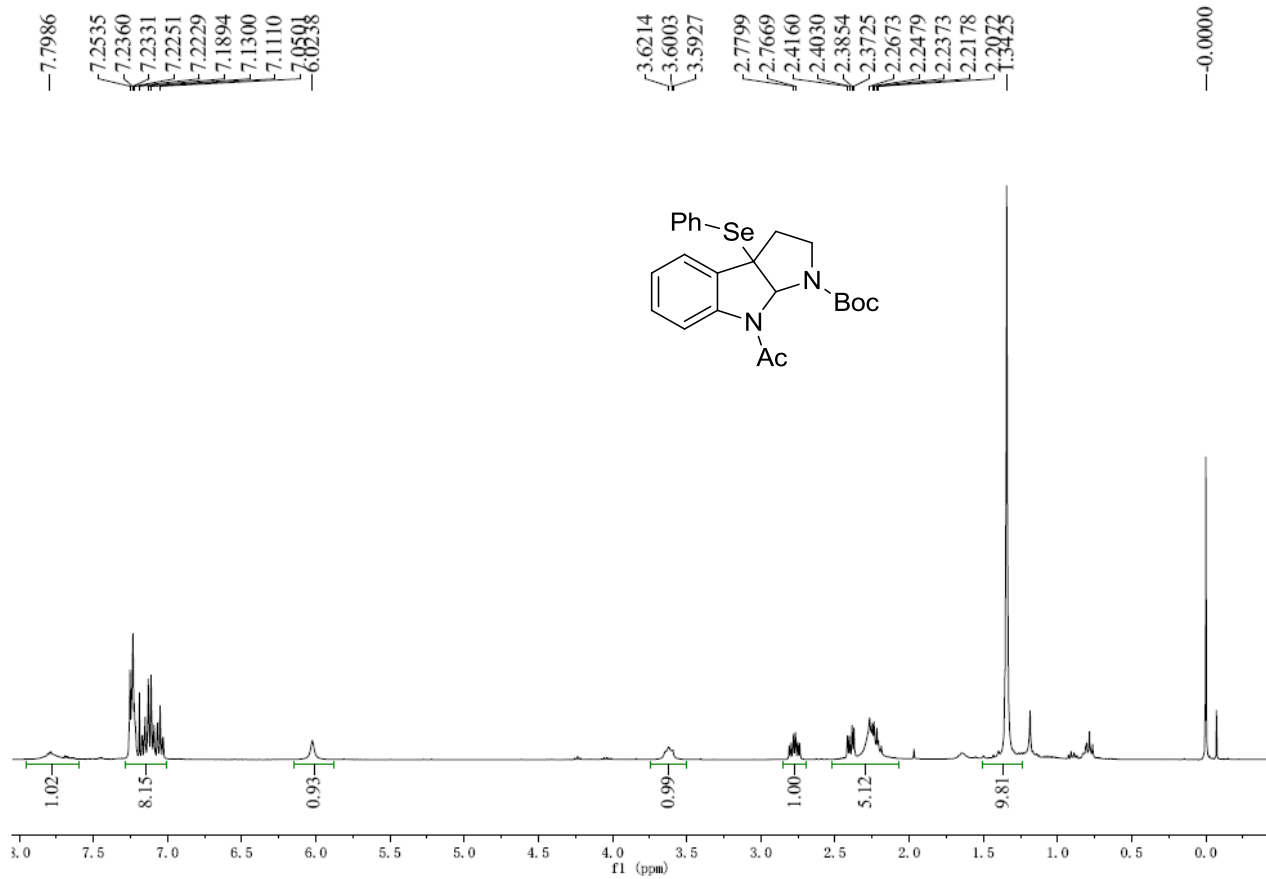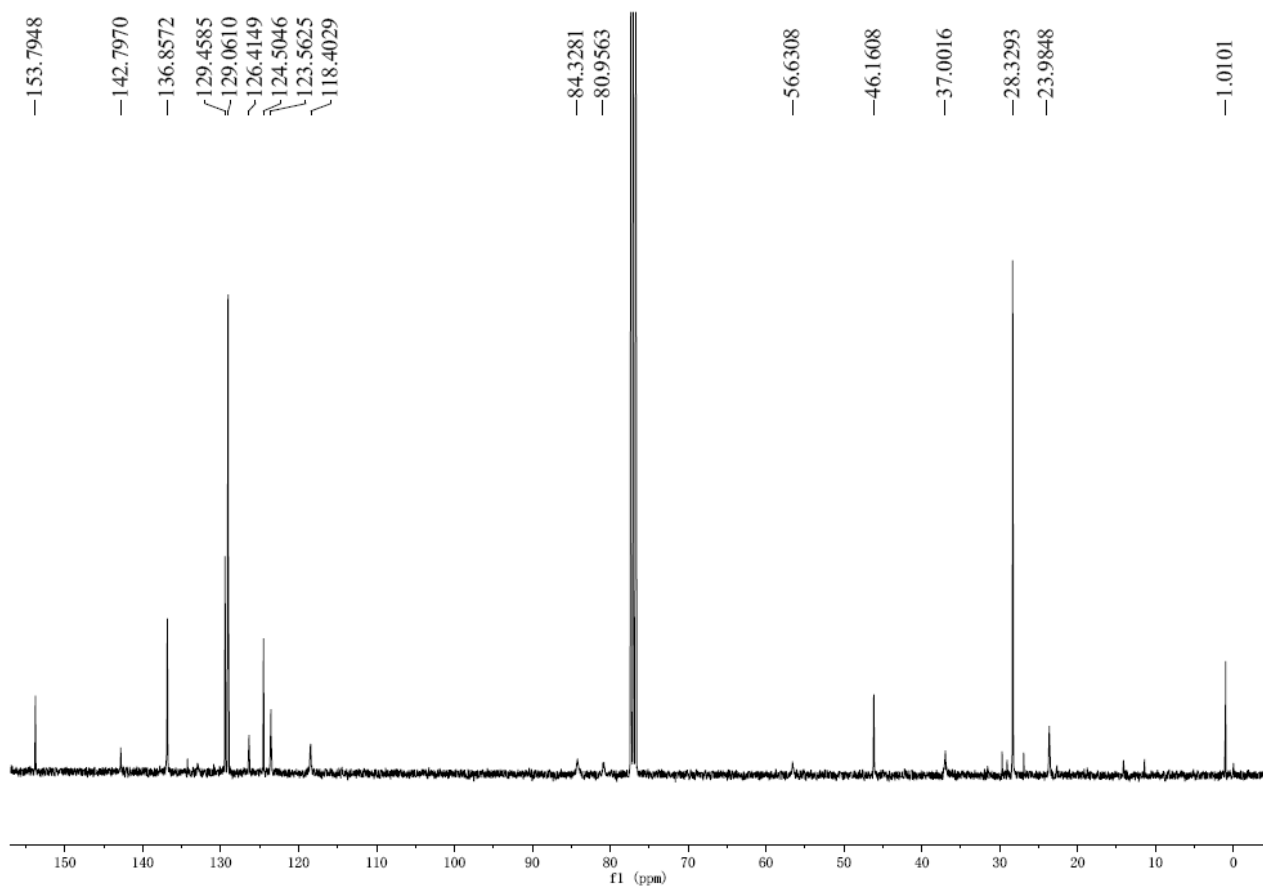

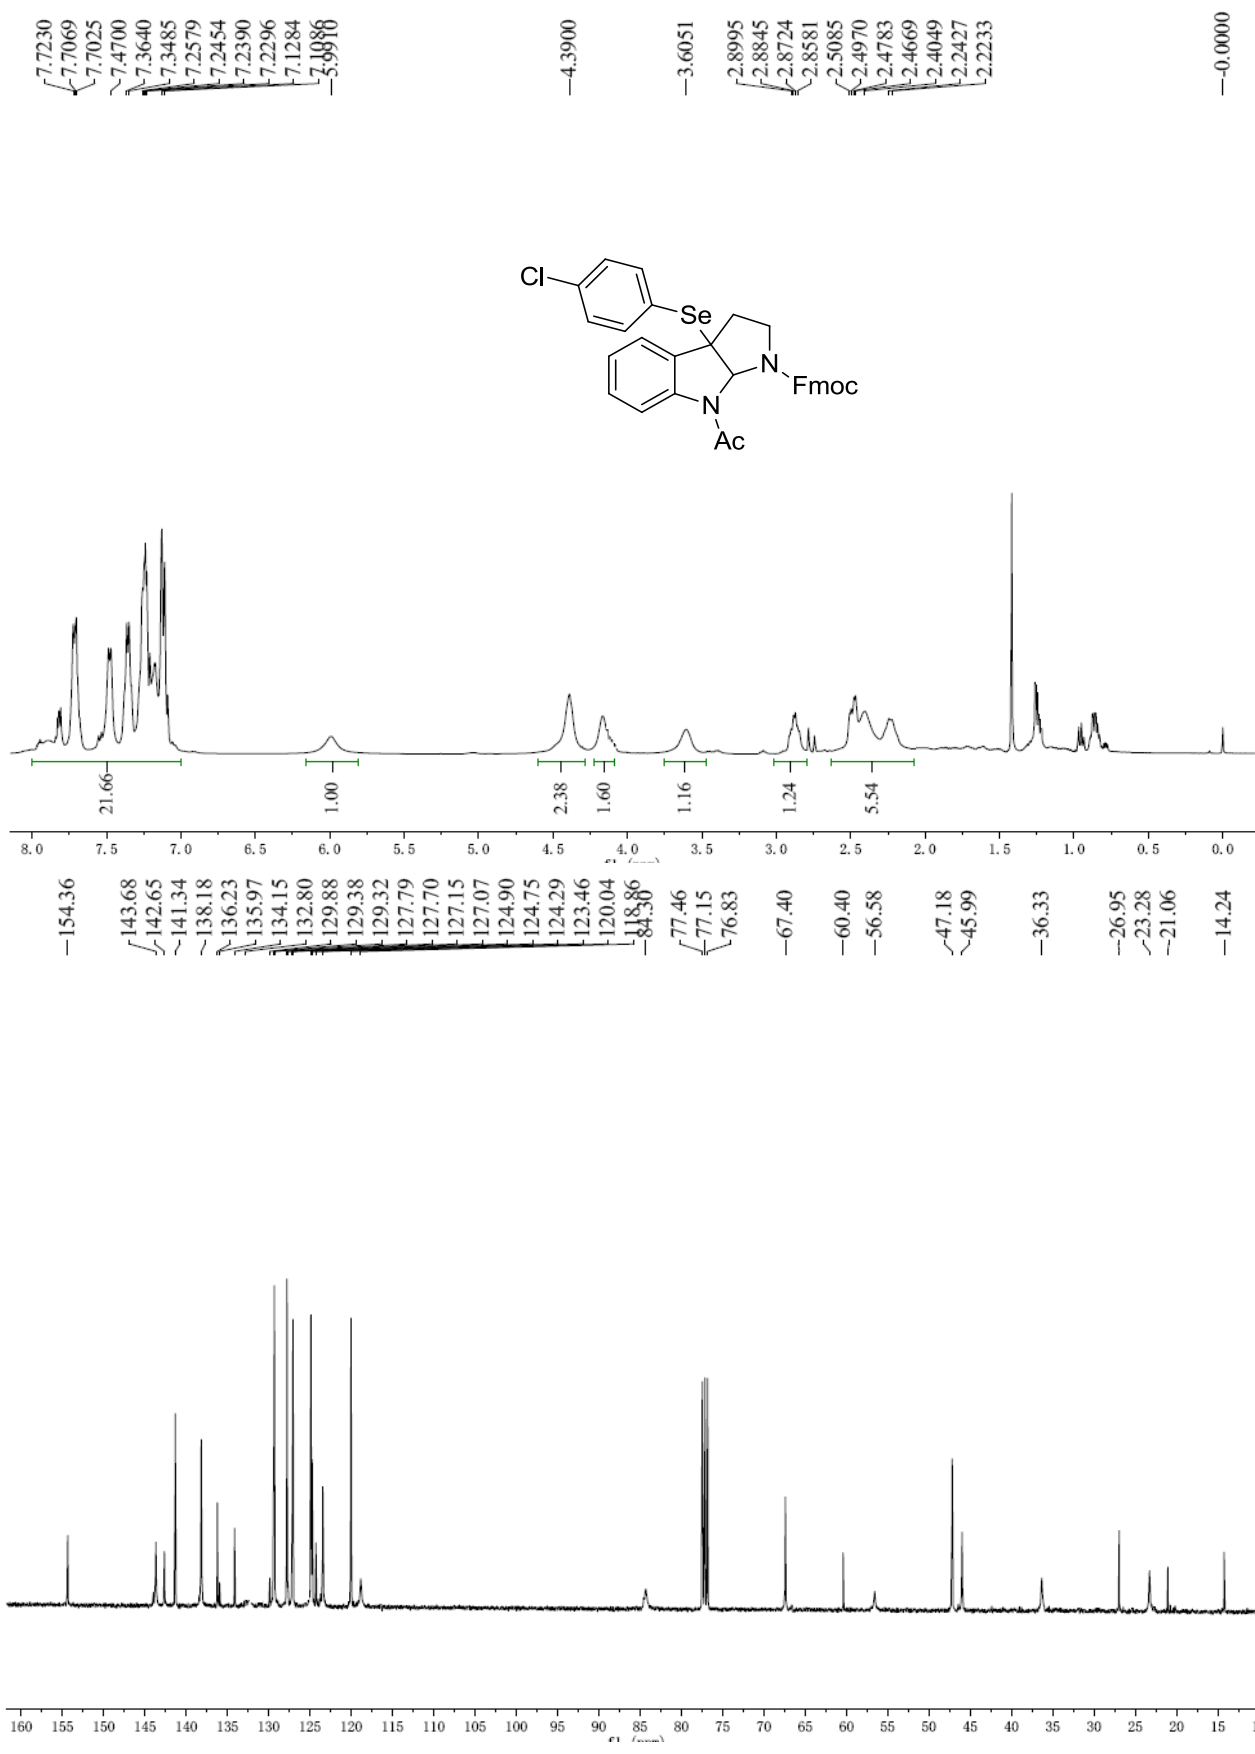

7.7284  
7.7158  
7.7089  
7.3651  
7.2718  
7.2529  
7.2428  
7.2330  
7.1026  
6.7061  
6.6852  
-5.9800  
4.3647  
4.3221  
4.3052  
4.1561  
4.1382  
3.9646  
3.9472  
3.9297  
3.9122  
2.9155  
2.9004  
2.8880  
2.8736  
2.8015  
2.4896  
2.4714  
2.4594  
1.3708  
1.3534  
1.3360  
-0.0000

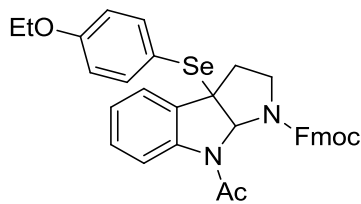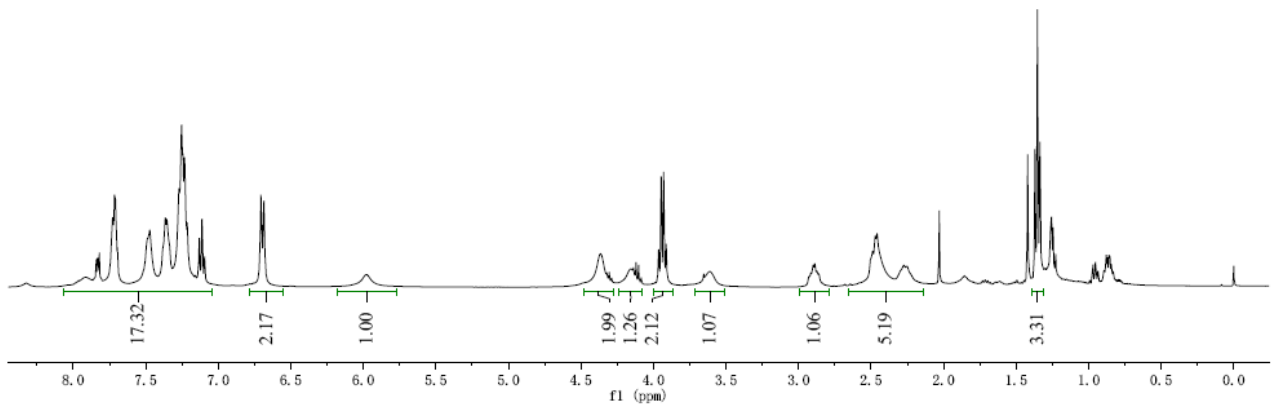

-168.14  
-160.22  
-154.41  
-143.72  
-142.62  
-141.32  
-138.60  
-134.21  
-132.77  
-129.14  
-127.78  
-127.14  
-127.07  
-124.94  
-124.64  
-123.51  
-123.41  
-120.02  
-118.81  
-116.67  
-115.37  
-67.43  
-63.55  
-47.16  
-46.06  
-26.95  
-14.68

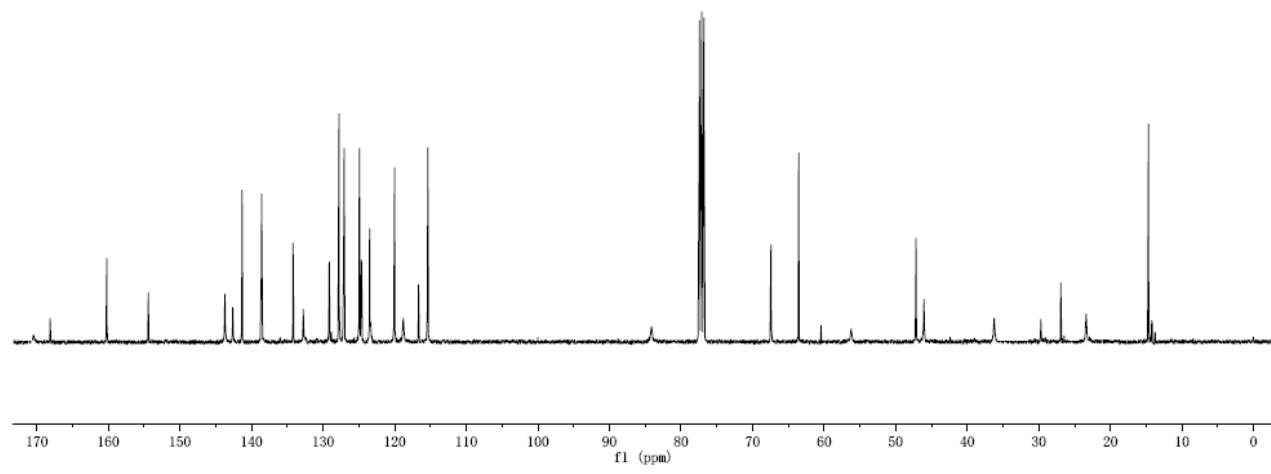



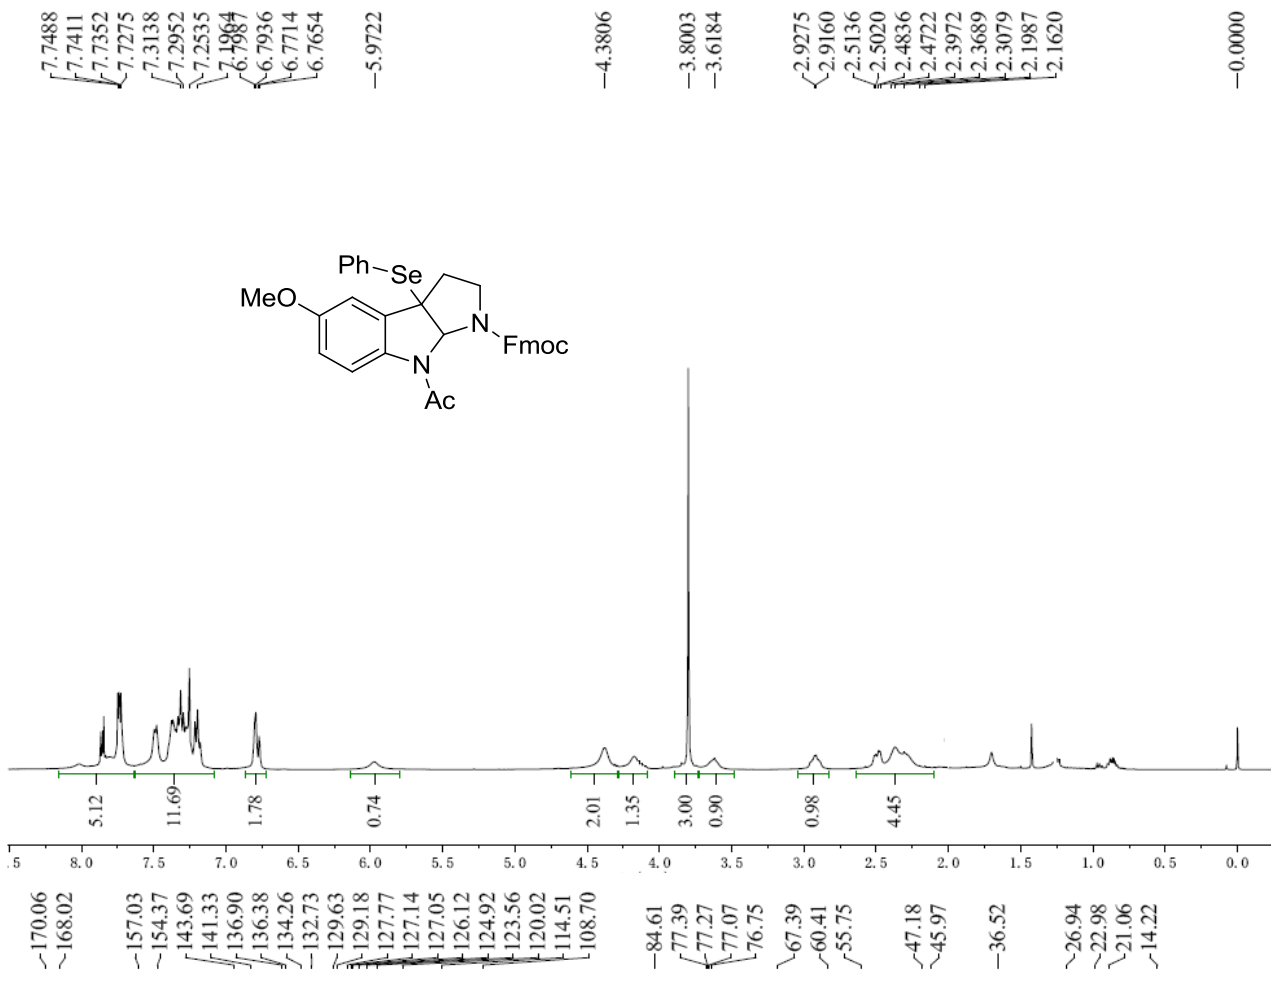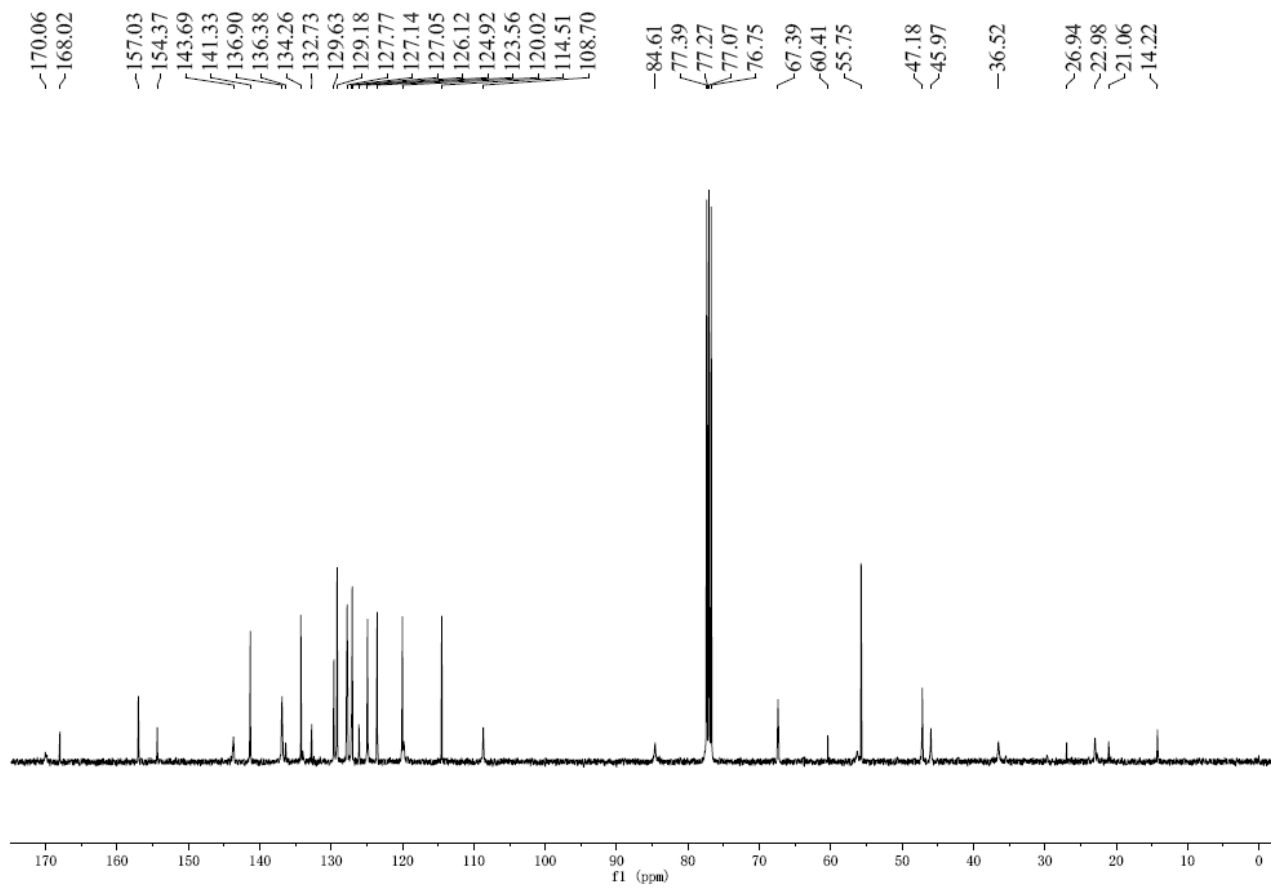

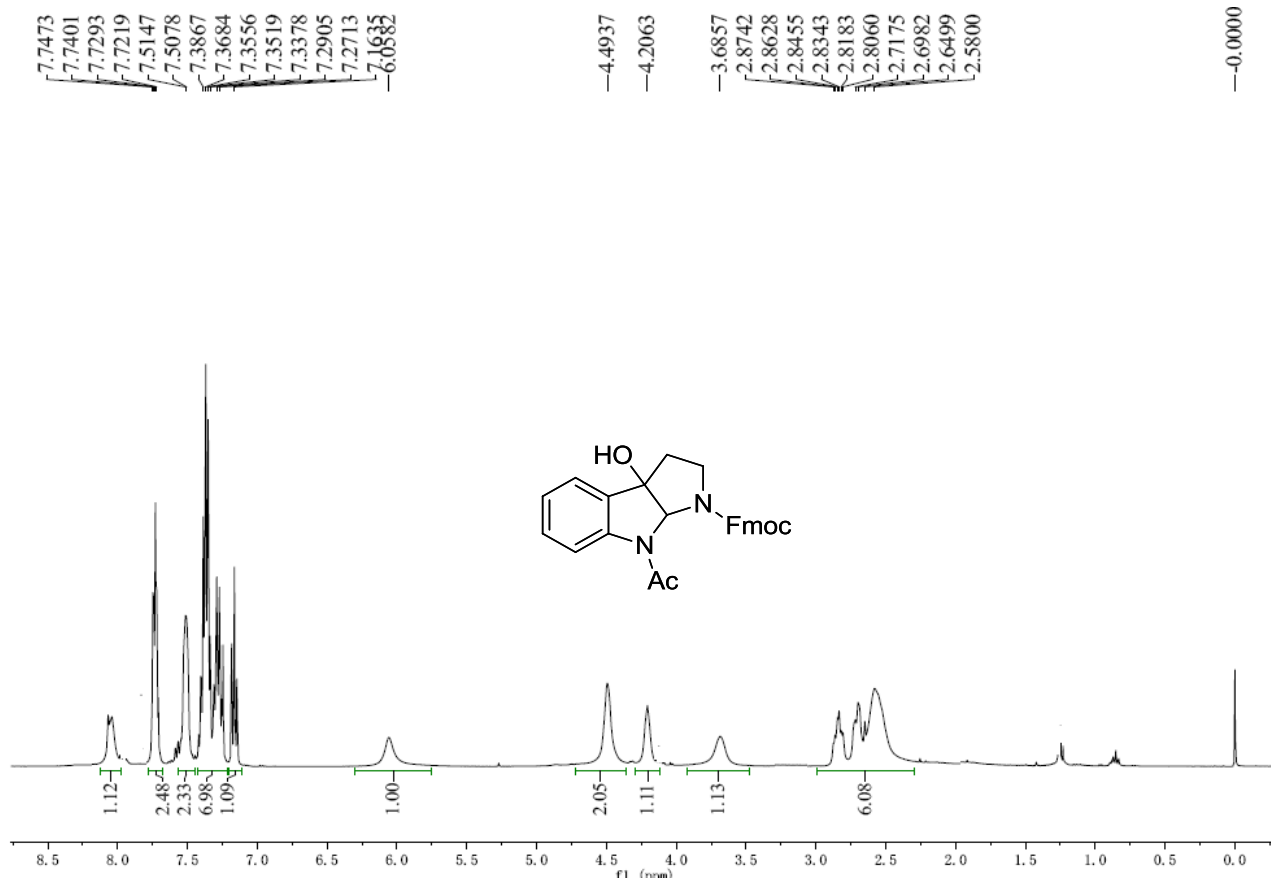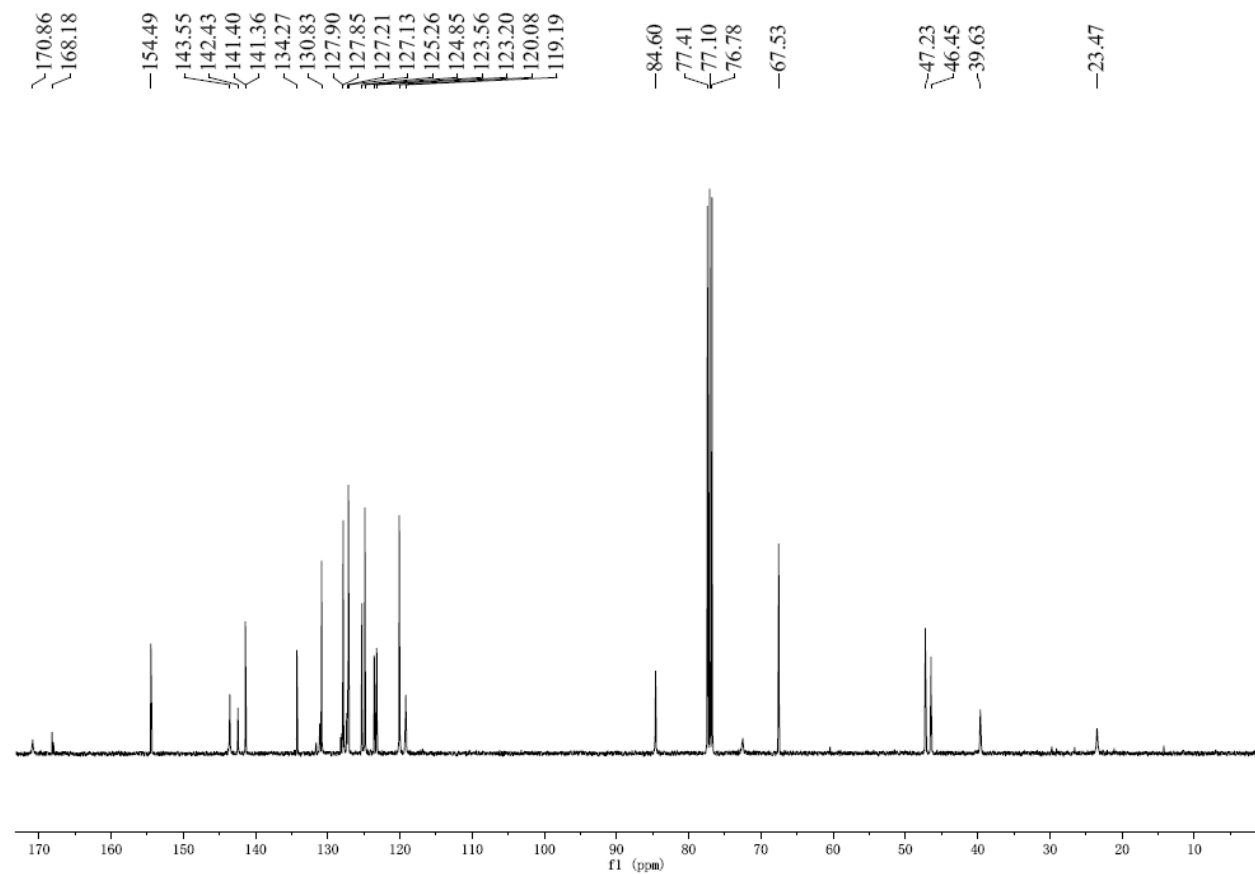

Supplement: Beilstein_J_Org_Chem-09-1559-s001.pdf [file Beilstein_J_Org_Chem-09-1559-s001.pdf]
